# Supplementary material
Source: PubMed Central journal article supplement (PMC3121837)
Supplement: 1103660108_SD01.pdf [file 1103660108_SD01.pdf]

## Dataset S1.

### (a) Summary of proteomic evidence supporting novel cyclotide sequences from *C. ternatea*.

The following MS spectra show the ProteinPilot-assigned peptide spectral matches (PSM) for full-length linearized cyclotides generated by endoproteinase Glu-C digestion (spectra named with suffix E), trypsin digestion (suffix T) and chymotrypsin digestion (suffix C). In many instances semi-endoGlu-C, semi-tryptic or semi-chymotryptic peptides were observed and the corresponding PSM have been included as additional lines of evidence supporting the full-length peptide assignments. In one case, Cter N, the assignment was performed using RapiDeNovo software (Bruker) after MS/MS performed on a Bruker UltrafleXtreme mass spectrometer. In all other cases, spectra were acquired on an Applied Biosystems QStar Elite mass spectrometer. As an example, the PSM of Cter M in spectrum E1a (Endo Glu-C digestion) shows the assignment of 25/29 amino acids. The unassigned amino acids were assigned in subsequent spectra (EndoGlu-C: E1b, E1c; tryptic: T1a-T1c). This is the case for each peptide sequenced. In the following dataset outputs from ProteinPilot, amino acid sequences coloured green represent PSMs identified with 95% confidence, yellow represent 50% confidence, red represent <50% confidence, and black are not matched. Sequence ion assignment is shown in each spectrum with y-ions shown in red and b-ions shown in green. The matched ions are also shown in the left panel, where green shading represents a matched ion.

## Evidence for Cter M:

### Endoproteinase Glu-C digest:

**TCTLGTCYVPDCSCSWPICMKNGLPTCGE**

NB: This peptide shows 75% sequence homology to kalata B7 (P58457) from *Oldenlandia affinis*.

```

1  GLPTCGETCTLGTCYVPDCSCSWPICMKN  29  Cter_M
1  GLPVCGETCTLGTCYTGCTCSWPICKRN  29  kB7
***.*****. :*:***** :*

```

### Fragmentation Evidence for Peptide

T[C][CAM]TLGT[C][CAM]YVPDC[C][CAM]SC[C][CAM]SWPIC[C][CAM]MKNGLPT[C][CAM]GE

| Residue | b                | b+2              | y                | y+2              |
|---------|------------------|------------------|------------------|------------------|
| T       | 102.0550         | 51.5311          | 3424.3903        | <b>1712.6988</b> |
| C[CAM]  | <b>262.0856</b>  | 131.5464         | 3323.3427        | 1662.1750        |
| T       | <b>363.1333</b>  | 182.0703         | 3163.3120        | 1582.1596        |
| L       | <b>476.2173</b>  | 238.6123         | 3062.2643        | 1531.6358        |
| G       | <b>533.2388</b>  | 267.1230         | 2949.1803        | <b>1475.0938</b> |
| T       | 634.2865         | 317.6469         | 2892.1588        | 1446.5830        |
| C[CAM]  | 794.3171         | 397.6622         | 2791.1111        | <b>1396.0592</b> |
| Y       | <b>957.3805</b>  | <b>479.1939</b>  | 2631.0805        | <b>1316.0439</b> |
| V       | <b>1056.4489</b> | <b>528.7281</b>  | 2468.0172        | <b>1234.5122</b> |
| P       | 1153.5016        | 577.2545         | 2368.9487        | <b>1184.9780</b> |
| D       | 1268.5286        | 634.7679         | 2271.8960        | 1136.4516        |
| C[CAM]  | 1428.5592        | 714.7833         | 2156.8690        | 1078.9362        |
| S       | 1515.5913        | 758.2993         | 1996.8384        | <b>998.9228</b>  |
| C[CAM]  | <b>1675.6219</b> | 838.3146         | 1909.8064        | <b>955.4068</b>  |
| S       | 1762.6539        | 881.8306         | 1749.7757        | <b>875.3915</b>  |
| W       | 1948.7333        | <b>974.8703</b>  | 1662.7437        | <b>831.8755</b>  |
| P       | 2045.7860        | 1023.3966        | <b>1476.6644</b> | <b>738.8358</b>  |
| I       | 2158.8701        | <b>1079.9387</b> | 1379.6116        | 690.3094         |
| C[CAM]  | 2318.9007        | <b>1159.9540</b> | 1266.5275        | <b>633.7674</b>  |
| M       | 2449.9412        | 1225.4742        | <b>1106.4969</b> | 553.7521         |
| K       | 2578.0362        | 1289.5217        | <b>975.4564</b>  | 488.2318         |
| N       | 2692.0791        | <b>1346.5432</b> | <b>847.3614</b>  | 424.1844         |
| G       | 2749.1006        | 1375.0539        | 733.3185         | 367.1629         |
| L       | 2862.1846        | <b>1431.5960</b> | <b>676.2971</b>  | 338.6522         |
| P       | 2959.2374        | 1480.1223        | <b>563.2130</b>  | <b>282.1101</b>  |
| T       | 3060.2851        | <b>1530.6462</b> | <b>466.1602</b>  | 233.5838         |
| C[CAM]  | 3220.3157        | 1610.6615        | <b>365.1125</b>  | <b>183.0599</b>  |
| G       | 3277.3372        | 1639.1722        | <b>205.0819</b>  | 103.0446         |
| E       | 3406.3798        | 1703.6935        | <b>148.0604</b>  | 74.5339          |

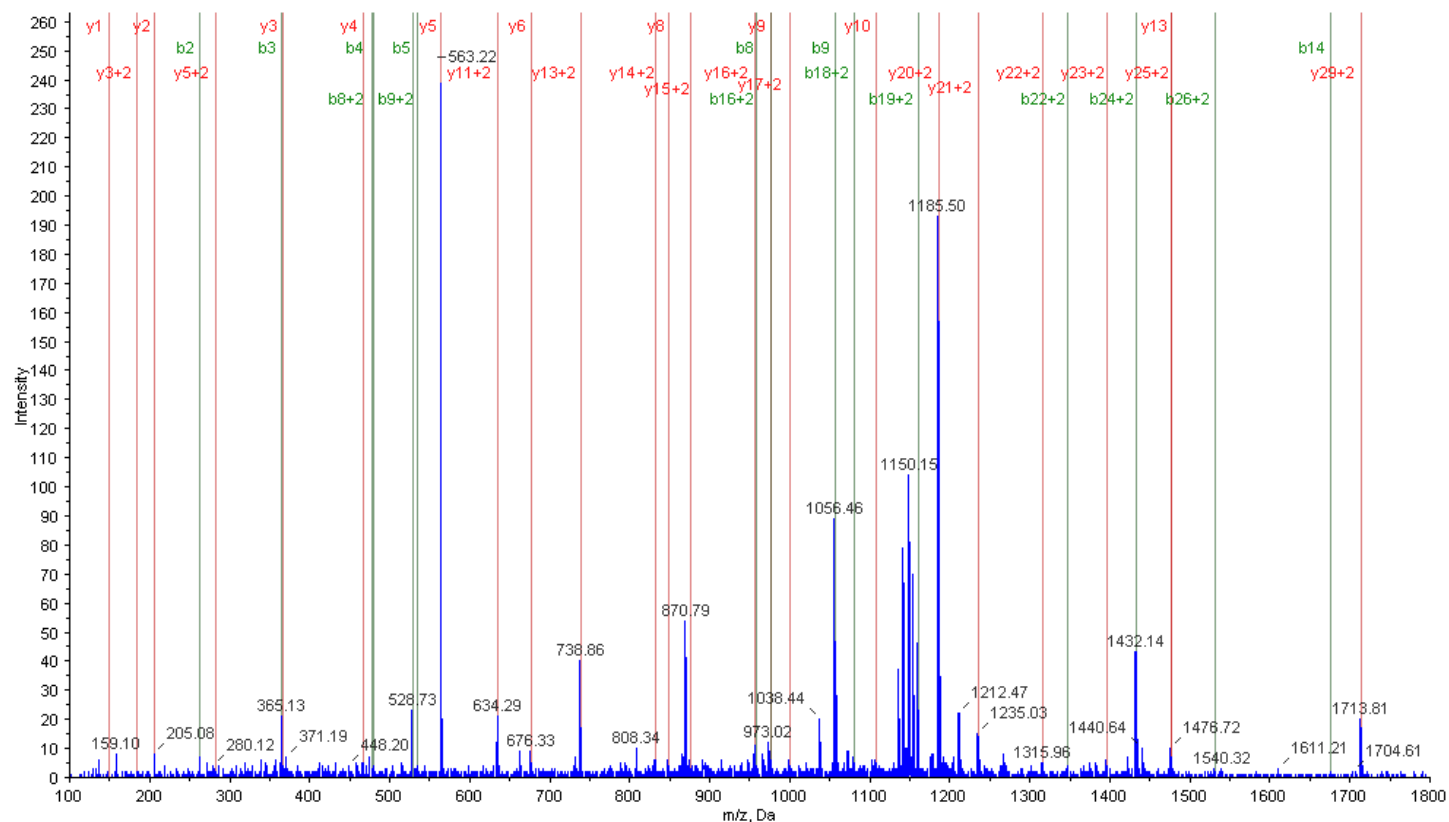

Supplementary spectrum E1a: MS/MS of  $m/z$  1142.13 (mass 3423.4 Da) showing sequence ion coverage. The derived sequence is TCTLGTCYVPDCSCSWPICMKNGLPTCGE.

### Fragmentation Evidence for Peptide

T[CAM]TLGTC[CAM]YVPDC[CAM]S

| Residue | b         | b+2      | y         | y+2      |
|---------|-----------|----------|-----------|----------|
| T       | 102.0550  | 51.5311  | 1533.6018 | 767.3046 |
| C[CAM]  | 262.0856  | 131.5464 | 1432.5541 | 716.7807 |
| T       | 363.1333  | 182.0703 | 1272.5235 | 636.7654 |
| L       | 476.2173  | 238.6123 | 1171.4758 | 586.2415 |
| G       | 533.2388  | 267.1230 | 1058.3918 | 529.6995 |
| T       | 634.2865  | 317.6469 | 1001.3703 | 501.1888 |
| C[CAM]  | 794.3171  | 397.6622 | 900.3226  | 450.6649 |
| Y       | 957.3805  | 479.1939 | 740.2920  | 370.6496 |
| V       | 1056.4489 | 528.7281 | 577.2286  | 289.1180 |
| P       | 1153.5016 | 577.2545 | 478.1602  | 239.5838 |
| D       | 1268.5286 | 634.7679 | 381.1075  | 191.0574 |
| C[CAM]  | 1428.5592 | 714.7833 | 266.0805  | 133.5439 |
| S       | 1515.5913 | 758.2993 | 106.0499  | 53.5286  |

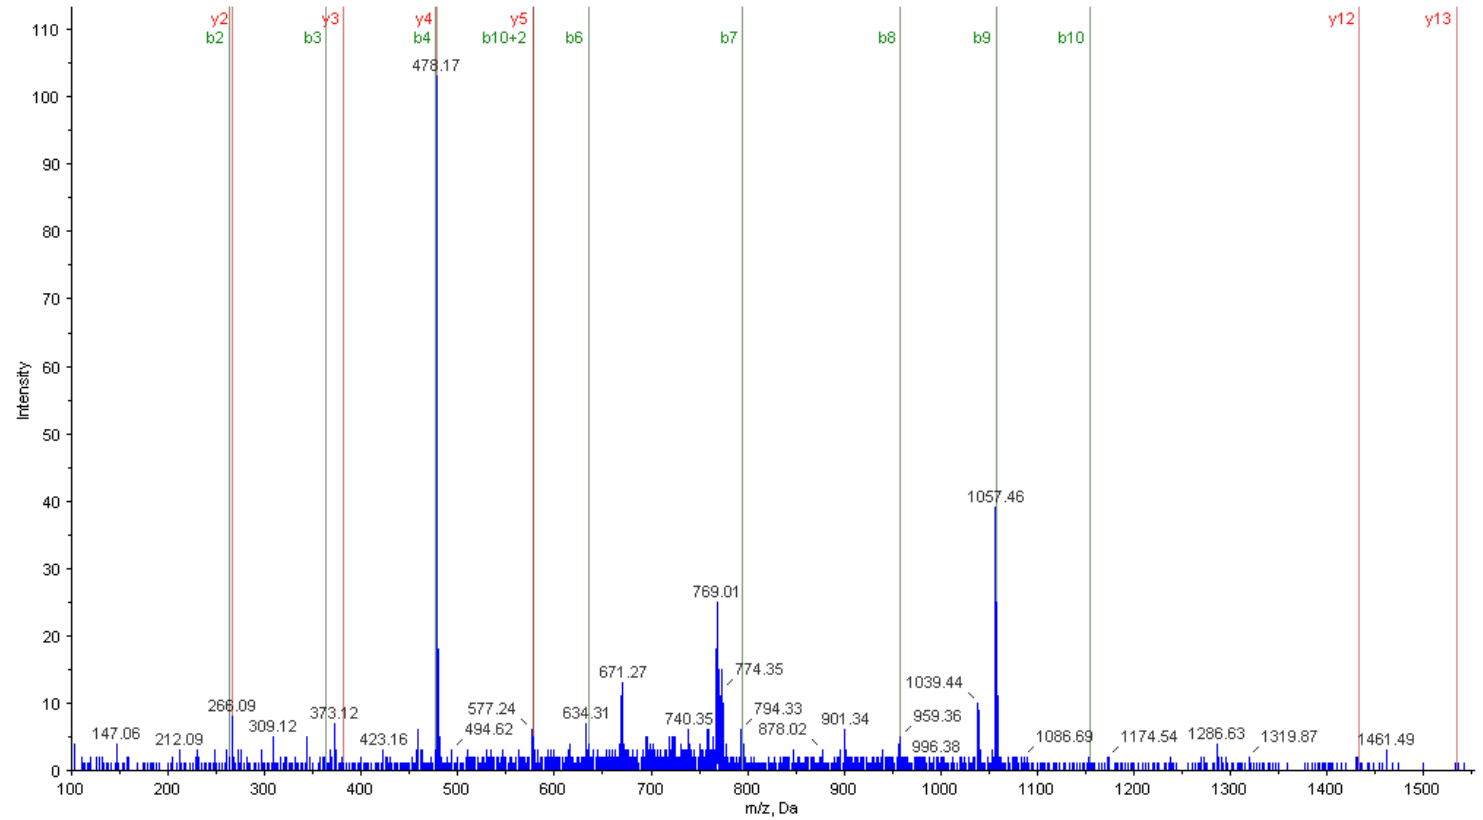

**Supplementary spectrum E1b:** MS/MS of  $m/z$  767.32 (mass 1532.62 Da) showing sequence ion coverage. The derived sequence is TCTLGTCYVPDCS.

### Fragmentation Evidence for Peptide

[C(CAM)]SWPIC(CAM)MKNGLP(CAM)GE

| Residue | b         | b+2      | y         | y+2      |
|---------|-----------|----------|-----------|----------|
| C(CAM)  | 161.0379  | 81.0226  | 1909.8064 | 955.4068 |
| S       | 248.0700  | 124.5386 | 1749.7757 | 875.3915 |
| W       | 434.1493  | 217.5783 | 1662.7437 | 831.8755 |
| P       | 531.2020  | 266.1047 | 1476.6644 | 738.8358 |
| I       | 644.2861  | 322.6467 | 1379.6116 | 690.3094 |
| C(CAM)  | 804.3167  | 402.6620 | 1266.5275 | 633.7674 |
| M       | 935.3572  | 468.1823 | 1106.4969 | 553.7521 |
| K       | 1063.4522 | 532.2297 | 975.4564  | 488.2318 |
| N       | 1177.4951 | 589.2512 | 847.3614  | 424.1844 |
| G       | 1234.5166 | 617.7619 | 733.3185  | 367.1629 |
| L       | 1347.6006 | 674.3040 | 676.2971  | 338.6522 |
| P       | 1444.6534 | 722.8303 | 563.2130  | 282.1101 |
| T       | 1545.7011 | 773.3542 | 466.1602  | 233.5838 |
| C(CAM)  | 1705.7317 | 853.3695 | 365.1125  | 183.0599 |
| G       | 1762.7532 | 881.8802 | 205.0819  | 103.0446 |
| E       | 1891.7958 | 946.4015 | 148.0604  | 74.5339  |

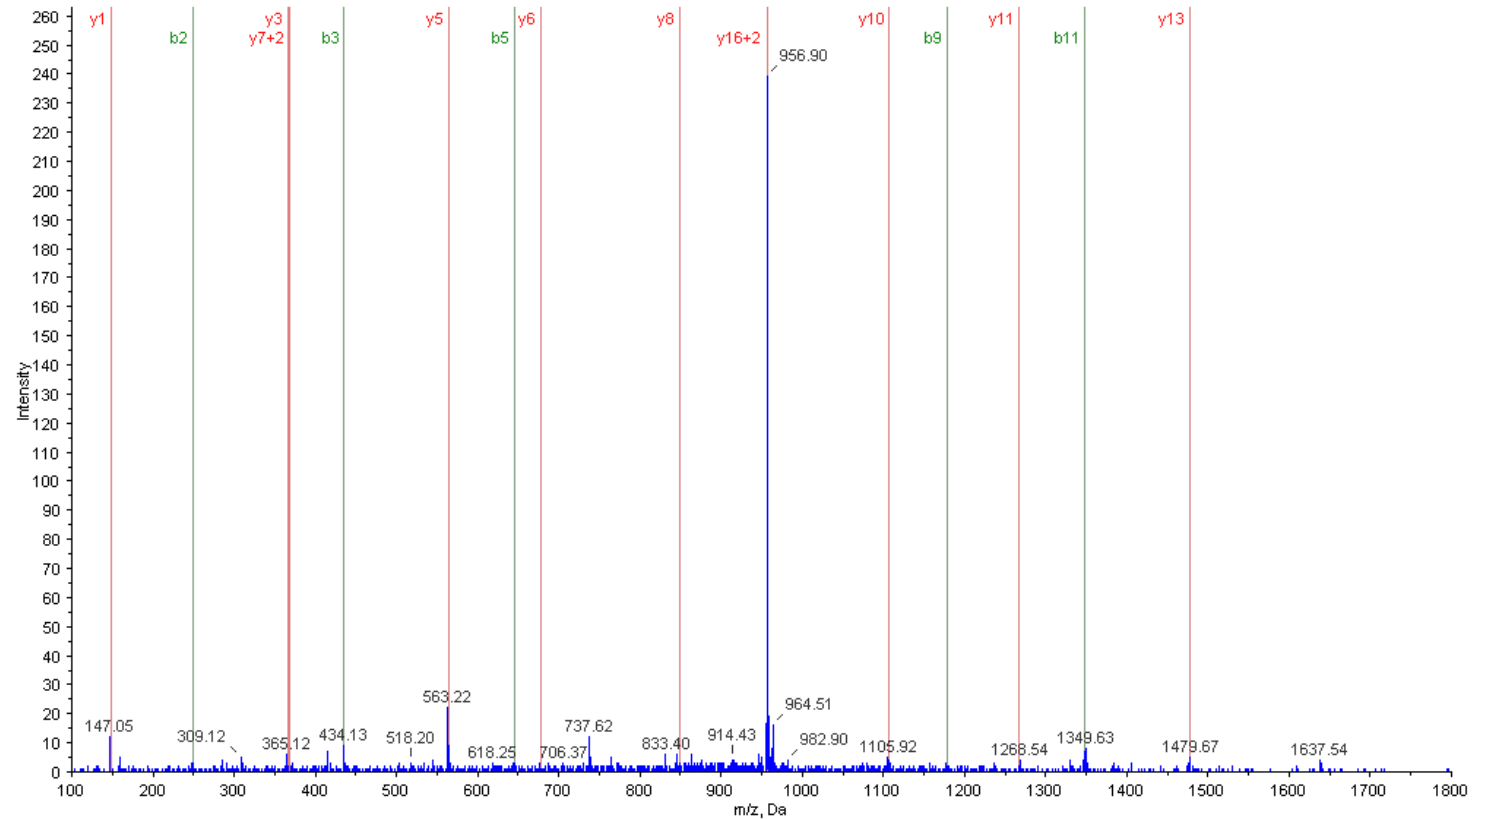

**Supplementary spectrum E1c:** MS/MS of  $m/z$  955.41 (mass 1908.81 Da) showing sequence ion coverage. The derived sequence is SWPICMKNGLP(CAM)GE.

**Trypsin digest:**

**NGLP**T**CG**E**T**C**T**L**G**T**C**Y**VPDC**S**C**S**W**P**I**C**M**K****

**Fragmentation Evidence for Peptide**

NGLP**T**[CAM]G**E**T**C**[CAM]T**L**G**T**C[CAM]Y**V**PDC[CAM]S**C**[CAM]S**W**P**I**C[CAM]M**K**

| Residue | b         | b+2       | y         | y+2       |
|---------|-----------|-----------|-----------|-----------|
| N       | 115.0502  | 58.0287   | 3424.3903 | 1712.6988 |
| G       | 172.0717  | 86.5395   | 3310.3474 | 1655.6773 |
| L       | 285.1557  | 143.0815  | 3253.3260 | 1627.1666 |
| P       | 382.2085  | 191.6079  | 3140.2419 | 1570.6246 |
| T       | 483.2562  | 242.1317  | 3043.1891 | 1522.0982 |
| C[CAM]  | 643.2868  | 322.1470  | 2942.1414 | 1471.5744 |
| G       | 700.3083  | 350.6578  | 2782.1108 | 1391.5590 |
| E       | 829.3509  | 415.1791  | 2725.0893 | 1363.0483 |
| T       | 930.3986  | 465.7029  | 2596.0467 | 1298.5270 |
| C[CAM]  | 1090.4292 | 545.7182  | 2494.9991 | 1248.0032 |
| T       | 1191.4769 | 596.2421  | 2334.9684 | 1167.9878 |
| L       | 1304.5609 | 652.7841  | 2233.9207 | 1117.4640 |
| G       | 1361.5824 | 681.2948  | 2120.8367 | 1060.9220 |
| T       | 1462.6301 | 731.8187  | 2063.8152 | 1032.4112 |
| C[CAM]  | 1622.6607 | 811.8340  | 1962.7675 | 981.8874  |
| Y       | 1785.7241 | 893.3657  | 1802.7369 | 901.8721  |
| V       | 1884.7925 | 942.8999  | 1639.6736 | 820.3404  |
| P       | 1981.8452 | 991.4263  | 1540.6051 | 770.8062  |
| D       | 2096.8722 | 1048.9397 | 1443.5524 | 722.2798  |
| C[CAM]  | 2256.9028 | 1128.9551 | 1328.5254 | 664.7664  |
| S       | 2343.9349 | 1172.4711 | 1168.4948 | 584.7510  |
| C[CAM]  | 2503.9655 | 1252.4864 | 1081.4628 | 541.2350  |
| S       | 2590.9975 | 1296.0024 | 921.4321  | 461.2197  |
| W       | 2777.0769 | 1389.0421 | 834.4001  | 417.7037  |
| P       | 2874.1296 | 1437.5684 | 648.3208  | 324.6640  |
| I       | 2987.2137 | 1494.1105 | 551.2680  | 276.1376  |
| C[CAM]  | 3147.2443 | 1574.1256 | 438.1839  | 219.5956  |
| M       | 3278.2848 | 1639.6460 | 278.1533  | 139.5803  |
| K       | 3406.3798 | 1703.6935 | 147.1128  | 74.0600   |

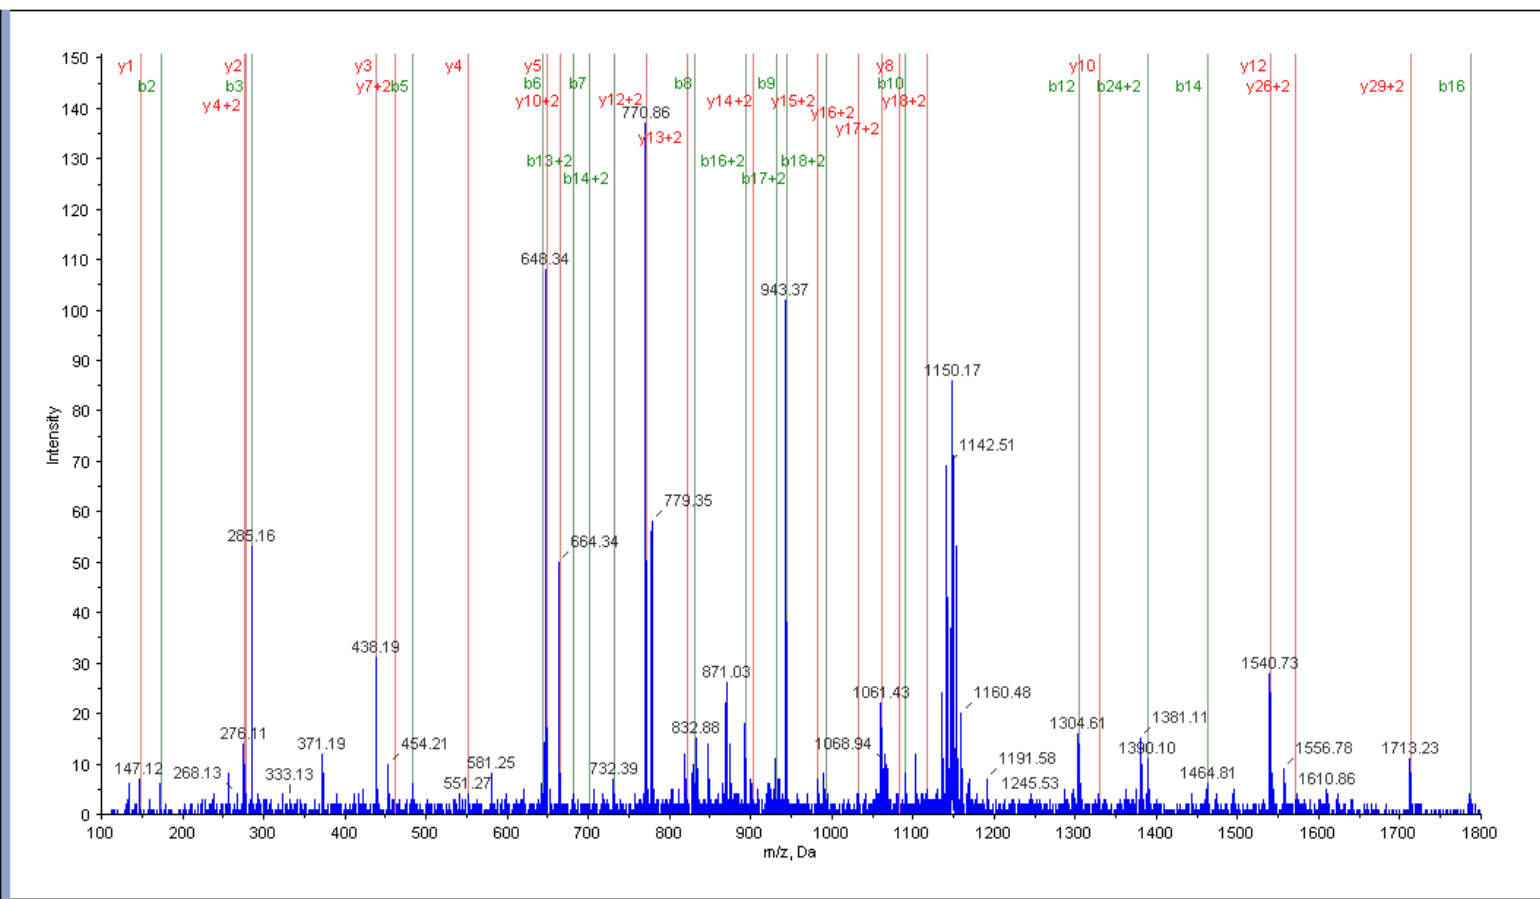

**Supplementary spectrum T1a:** MS/MS of  $m/z$  1142.13 (mass 3423.38 Da) showing sequence ion coverage. The derived sequence is NGLPTCGETCTLGTCYVPDCSCSWPICMK.

### Fragmentation Evidence for Peptide

C[CAM]YVPDC[CAM]SC[CAM]SWPIC[CAM]MK

| Residue | b                | b+2      | y                | y+2             |
|---------|------------------|----------|------------------|-----------------|
| C[CAM]  | 161.0379         | 81.0226  | 1962.7675        | <b>981.8874</b> |
| Y       | <b>324.1013</b>  | 162.5543 | 1802.7369        | 901.8721        |
| V       | <b>423.1697</b>  | 212.0885 | 1639.6736        | <b>820.3404</b> |
| P       | <b>520.2224</b>  | 260.6149 | <b>1540.6051</b> | <b>770.8062</b> |
| D       | <b>635.2494</b>  | 318.1283 | 1443.5524        | 722.2798        |
| C[CAM]  | <b>795.2800</b>  | 398.1436 | 1328.5254        | 664.7664        |
| S       | 882.3121         | 441.6597 | 1168.4948        | 584.7510        |
| C[CAM]  | 1042.3427        | 521.6750 | 1081.4628        | 541.2350        |
| S       | 1129.3747        | 565.1910 | 921.4321         | 461.2197        |
| W       | <b>1315.4540</b> | 658.2307 | 834.4001         | 417.7037        |
| P       | 1412.5068        | 706.7570 | <b>648.3208</b>  | 324.6640        |
| I       | 1525.5909        | 763.2991 | <b>551.2680</b>  | <b>276.1376</b> |
| C[CAM]  | 1685.6215        | 843.3144 | <b>438.1839</b>  | 219.5956        |
| M       | 1816.6620        | 908.8346 | <b>278.1533</b>  | 139.5803        |
| K       | 1944.7570        | 972.8821 | <b>147.1128</b>  | 74.0600         |

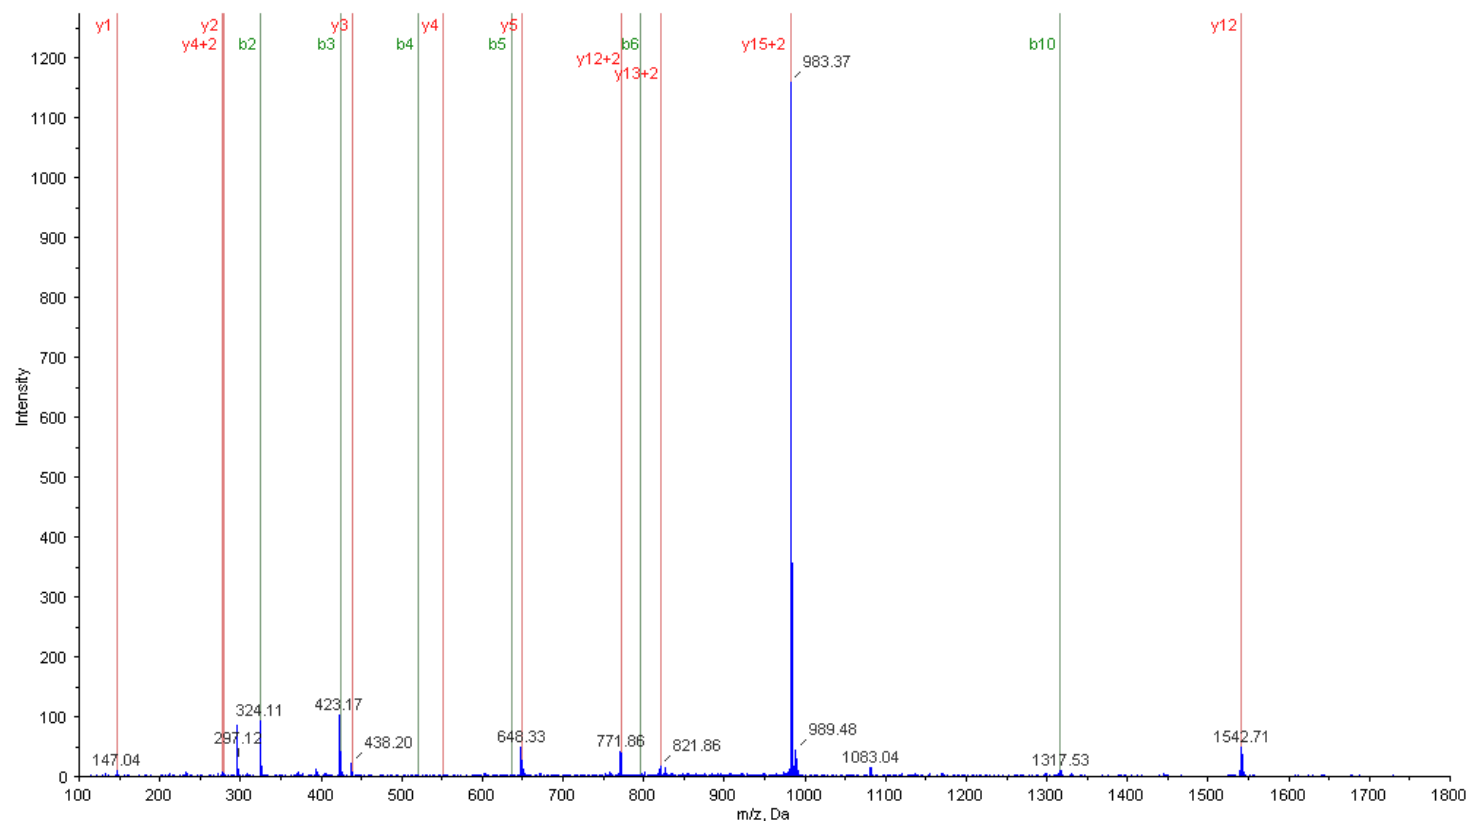

**Supplementary spectrum T1b:** MS/MS of  $m/z$  981.90 (mass 1961.78 Da) showing sequence ion coverage. The derived sequence is CYVPDCSCSWPICMK.

## Fragmentation Evidence for Peptide

[N[Dea]GLPTC[CAM]GETC[CAM]TLGT

| Residue | b         | b+2      | y         | y+2      |
|---------|-----------|----------|-----------|----------|
| N[Dea]  | 116.0342  | 58.5207  | 1481.6247 | 741.3160 |
| G       | 173.0557  | 87.0315  | 1366.5977 | 683.8025 |
| L       | 286.1397  | 143.5735 | 1309.5763 | 655.2918 |
| P       | 383.1925  | 192.0999 | 1196.4922 | 598.7497 |
| T       | 484.2402  | 242.6237 | 1099.4394 | 550.2234 |
| C[CAM]  | 644.2708  | 322.6391 | 998.3918  | 499.6995 |
| G       | 701.2923  | 351.1498 | 838.3611  | 419.6842 |
| E       | 830.3349  | 415.6711 | 781.3396  | 391.1735 |
| T       | 931.3826  | 466.1949 | 652.2971  | 326.6522 |
| C[CAM]  | 1091.4132 | 546.2102 | 551.2494  | 276.1283 |
| T       | 1192.4609 | 596.7341 | 391.2187  | 196.1130 |
| L       | 1305.5450 | 653.2761 | 290.1710  | 145.5892 |
| G       | 1362.5664 | 681.7869 | 177.0870  | 89.0471  |
| T       | 1463.6141 | 732.3107 | 120.0655  | 60.5364  |

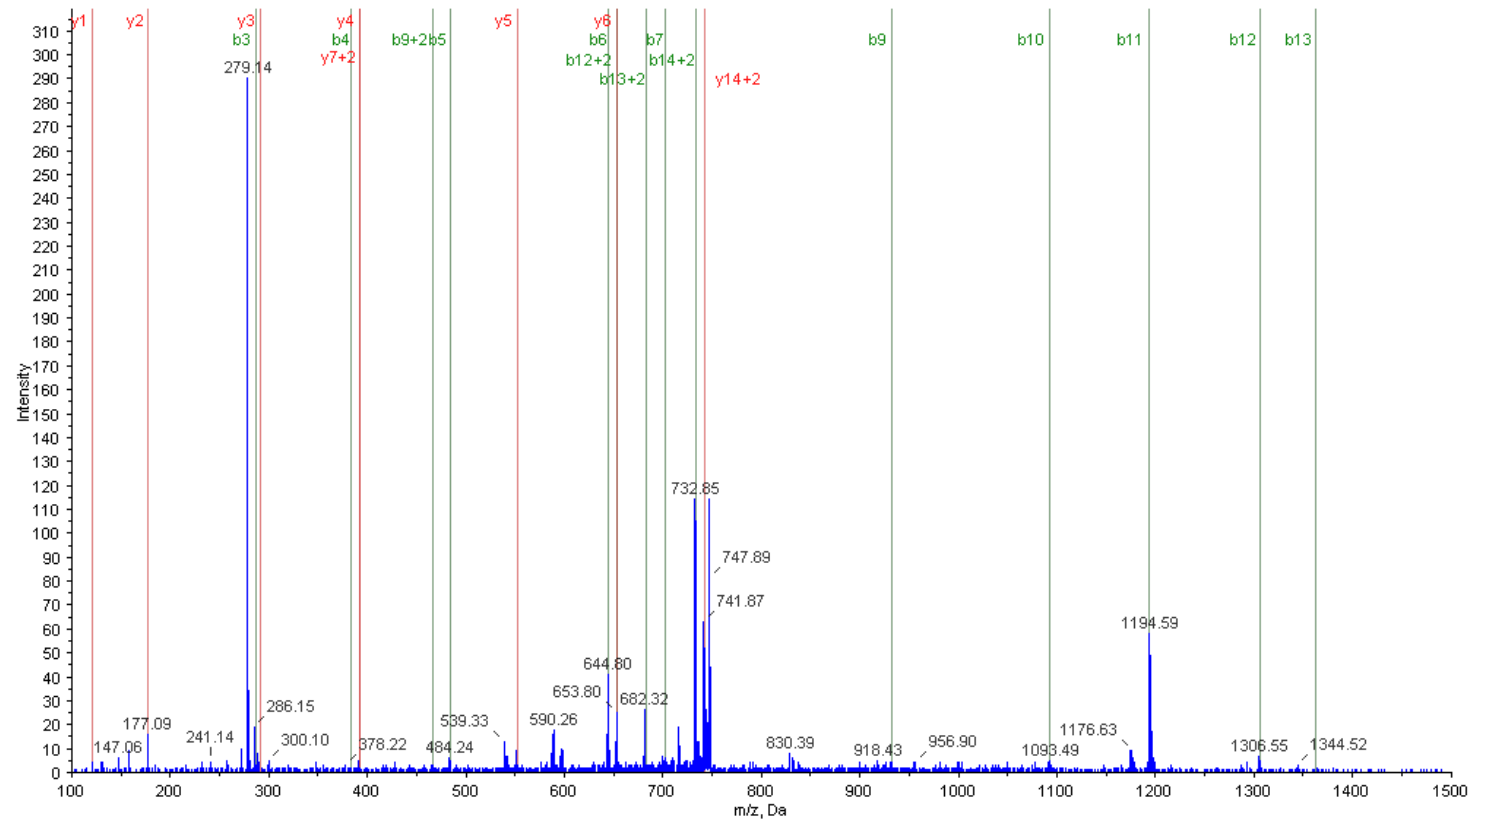

**Supplementary spectrum T1c:** MS/MS of  $m/z$  741.33 (mass 1480.65 Da) showing sequence ion coverage. The derived sequence is NGLPTCGETCTLGT.

**Evidence for Cter N:**

***Endoproteinase Glu-C digest:***

**TCVLGTCYTPDCSCTALVCLKNGSAFCGE**

NB: This peptide shows homology to kalata B9 (P85127) from *Oldenlandia affinis*.

```
1  GSAF-CGETCVLGTCTYTPDCSC-TALVCLKN  29  Cter_N
1  GSWFNCGETCVLGTCTYTPGCTCNTYRWCTKD  31  kB9
   **_* *****_*:* * ** *;
```



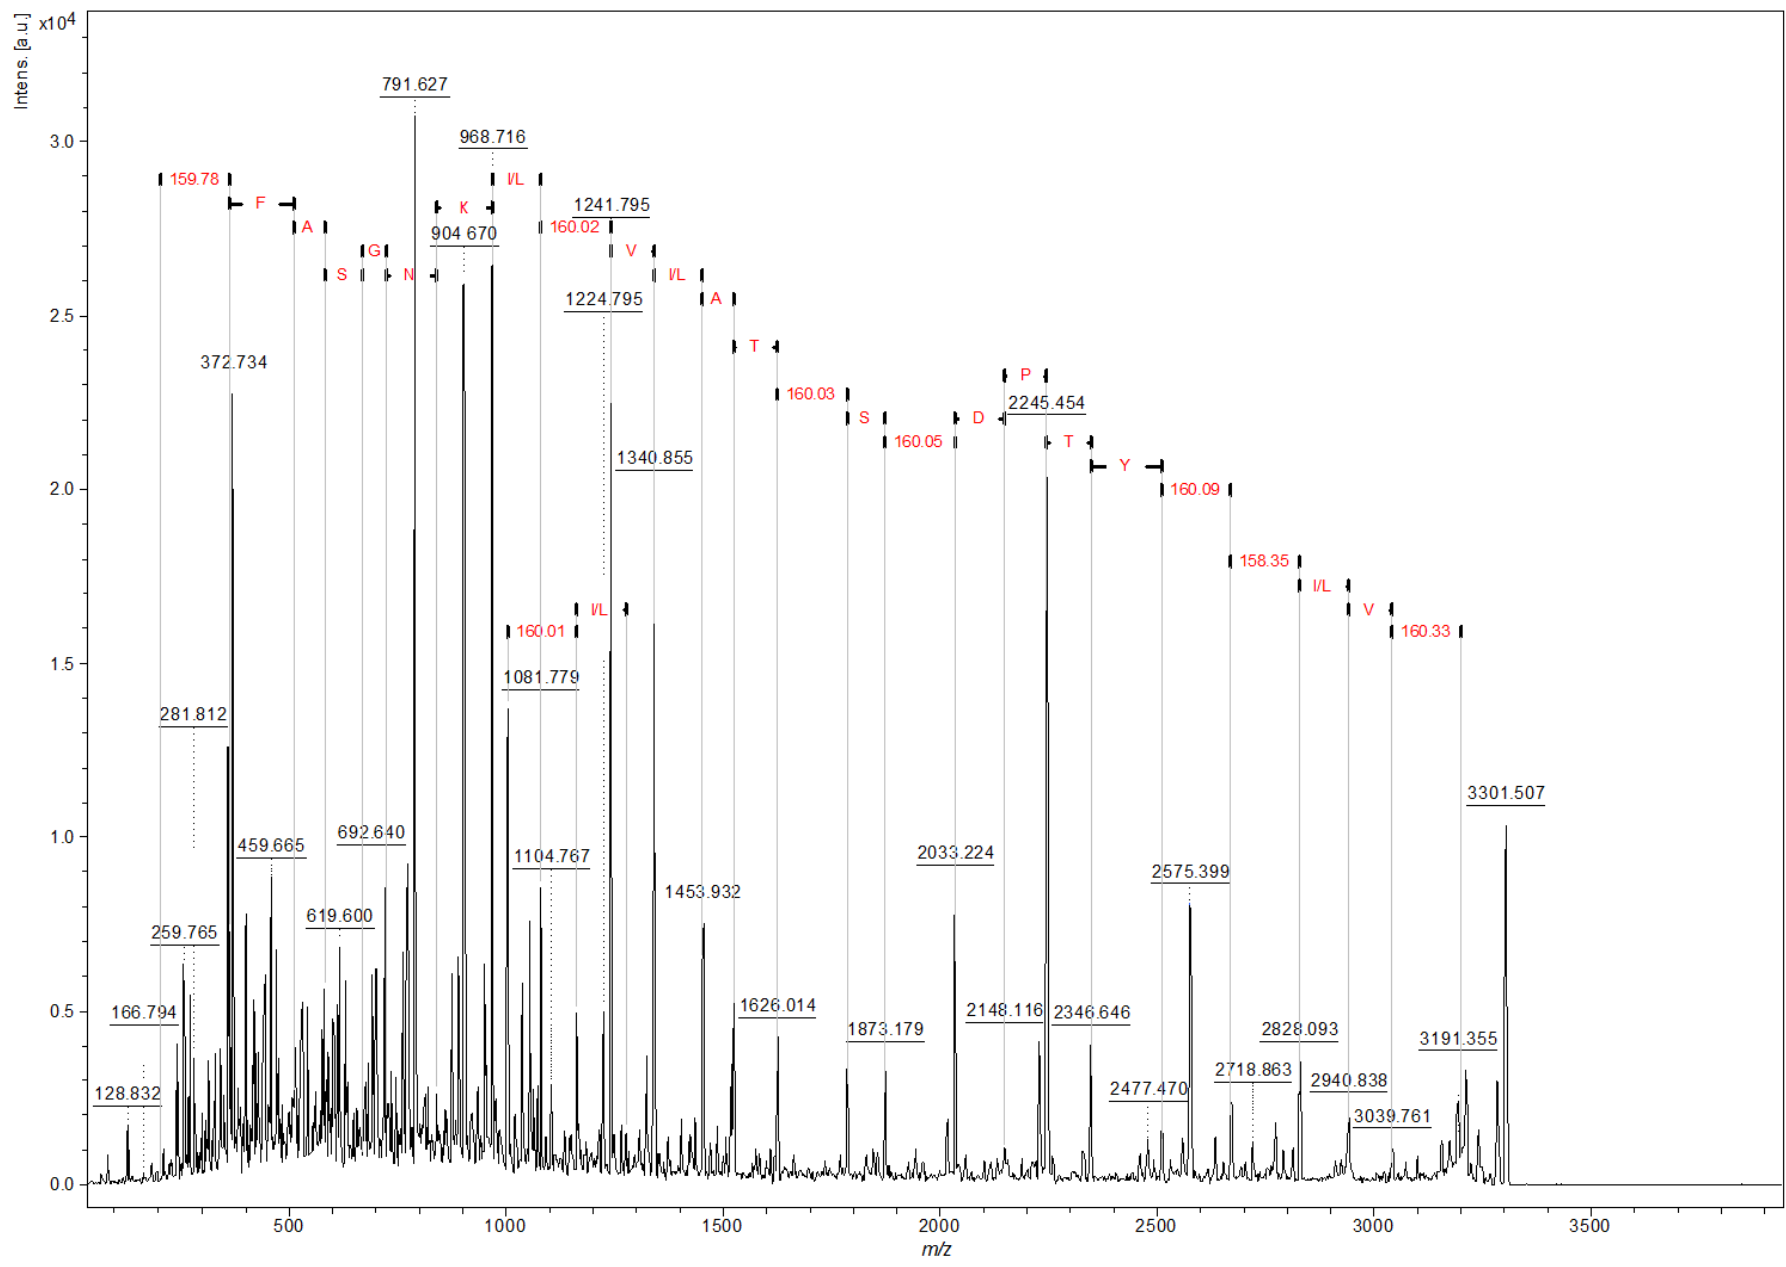

**Supplementary spectrum E2a:** MS/MS of  $m/z$  3301.42 (mass 3300.42 Da) showing sequence ion coverage. The derived sequence is TCVLGTCYTPDCSCTALVCLKNGSAFCGE.

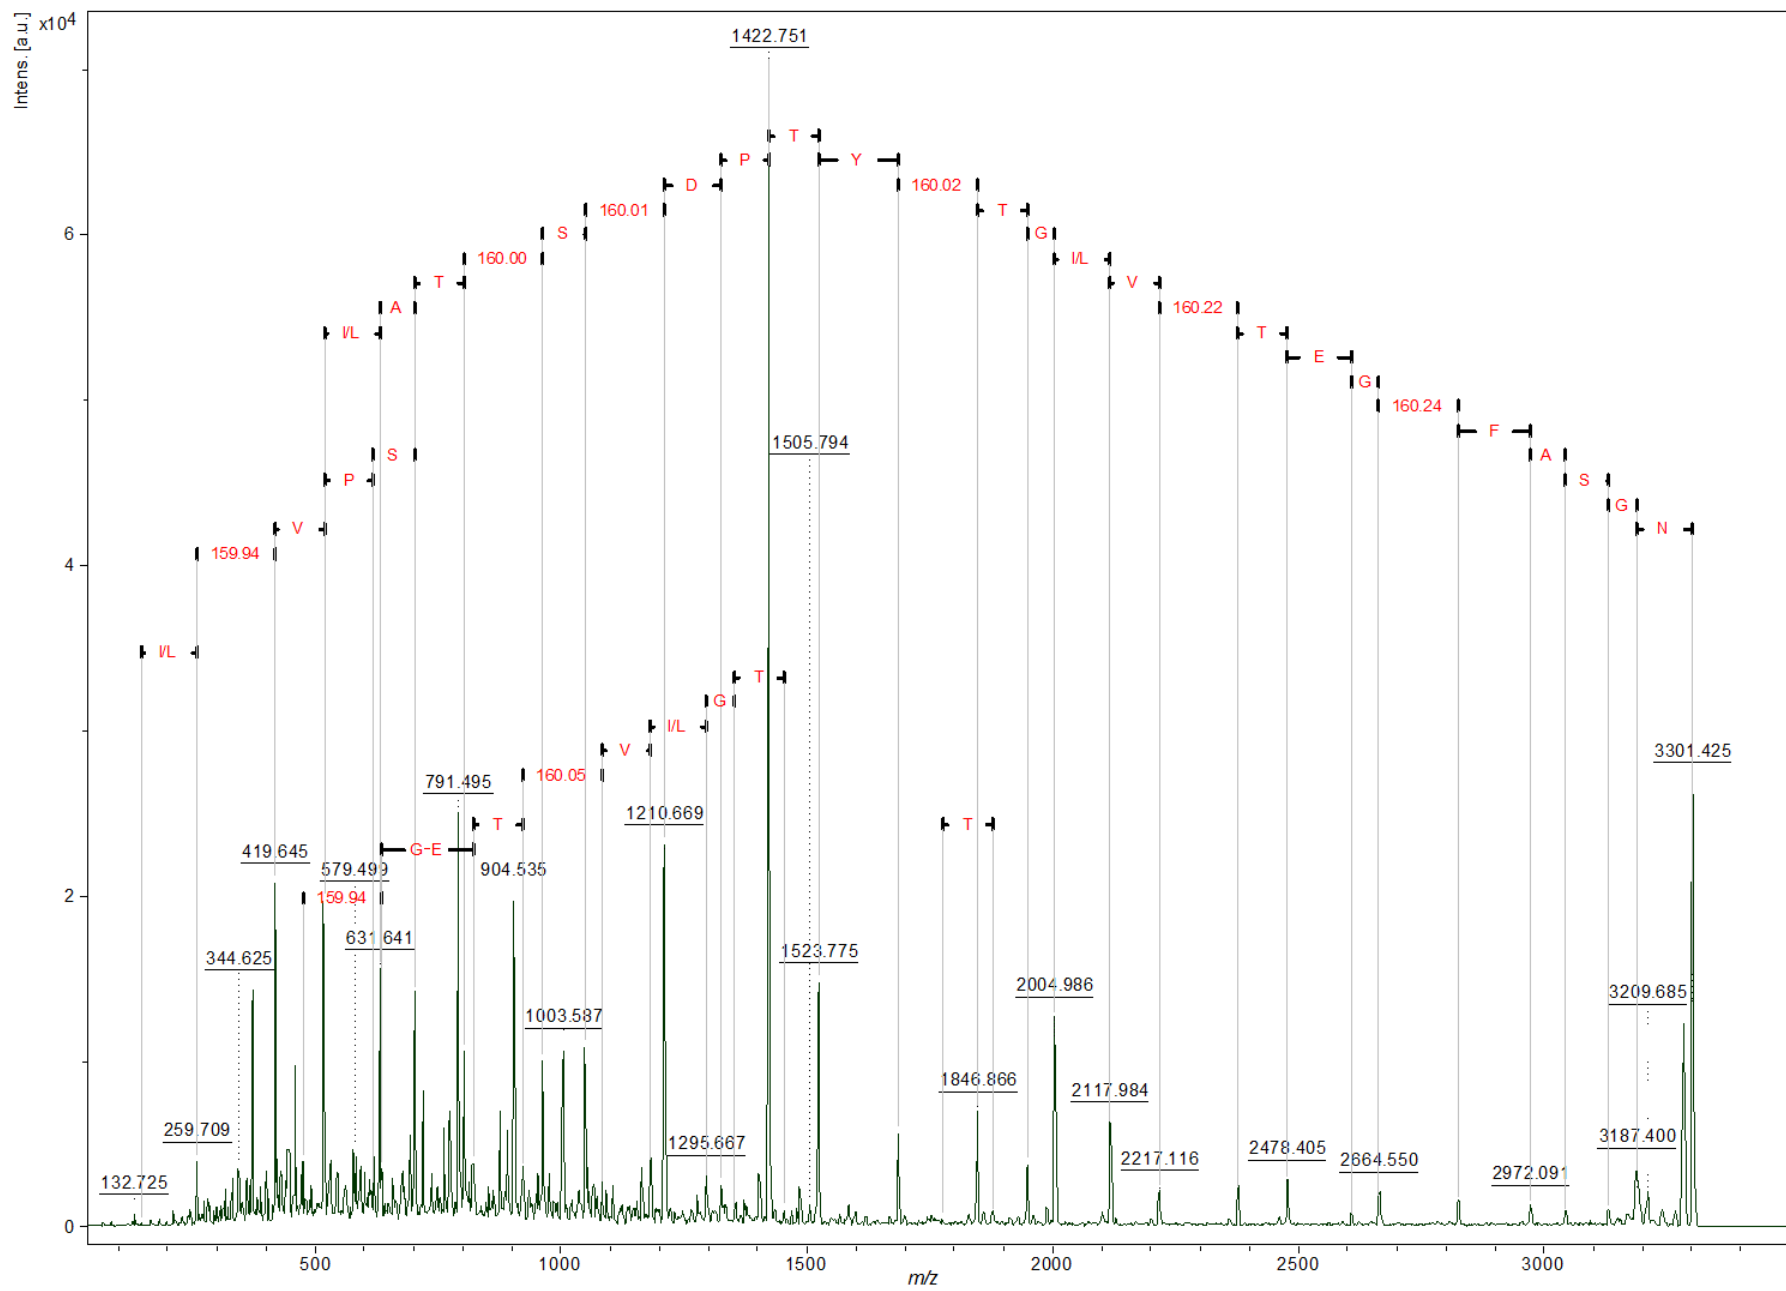

**Supplementary spectrum T2a:** MS/MS of  $m/z$  3301.42 (mass 3300.42 Da) showing sequence ion coverage. The derived sequence is NGS AFCGETCVLGTCYTPDCSCTALVCLK.

## Evidence for Cter O:

### Endoproteinase Glu-C digest:

**SCVFIPICITGIAGCSCKSKVCYRNGIPCGE**

NB: This peptide shows 93% sequence homology to circulin-C (P84641) from *Chassalia parvifolia*.

```

1  GIPCGESCVFIPICITGIAGCSCKSKVCYRN  30  Cter_0
1  GIPCGESCVFIPICITSVAGCSCKSKVCYRN  30  Circulin-C
*****_*****
  
```

### Fragmentation Evidence for Peptide

[SC[CAM]VFIPIC[CAM]ITGIAGC[CAM]SC[CAM]KSKVC[CAM]YRN[Dea]GIPC[CAM]GE

| Residue | b                | b+2             | y                | y+2              |
|---------|------------------|-----------------|------------------|------------------|
| S       | 88.0393          | 44.5233         | 3451.5394        | <b>1726.2733</b> |
| C[CAM]  | <b>248.0700</b>  | 124.5386        | 3364.5074        | 1682.7573        |
| V       | <b>347.1384</b>  | 174.0728        | 3204.4767        | 1602.7420        |
| F       | <b>494.2068</b>  | 247.6070        | 3105.4083        | 1553.2078        |
| I       | <b>607.2908</b>  | <b>304.1491</b> | 2958.3399        | 1479.6736        |
| P       | 704.3436         | 352.6754        | 2845.2558        | <b>1423.1315</b> |
| C[CAM]  | <b>864.3743</b>  | 432.6908        | 2748.2031        | <b>1374.6052</b> |
| I       | 977.4583         | 489.2328        | 2588.1724        | <b>1294.5898</b> |
| T       | 1078.5060        | 539.7566        | 2475.0883        | <b>1238.0478</b> |
| G       | <b>1135.5275</b> | <b>568.2674</b> | 2374.0407        | <b>1187.5240</b> |
| I       | 1248.6115        | 624.8094        | 2317.0192        | <b>1159.0132</b> |
| A       | 1319.6486        | <b>660.3280</b> | 2203.9351        | 1102.4712        |
| G       | 1376.6701        | 688.8387        | 2132.8980        | <b>1066.9527</b> |
| C[CAM]  | 1536.7008        | 768.8540        | 2075.8766        | 1038.4419        |
| S       | 1623.7328        | 812.3700        | 1915.8459        | 958.4266         |
| C[CAM]  | 1783.7634        | 892.3854        | 1828.8139        | 914.9106         |
| K       | 1911.8584        | 956.4328        | 1668.7832        | 834.8953         |
| S       | 1998.8904        | 999.9488        | 1540.6883        | 770.8478         |
| K       | 2126.9854        | 1063.9963       | 1453.6562        | 727.3318         |
| V       | 2226.0538        | 1113.5305       | <b>1325.5613</b> | 663.2843         |
| C[CAM]  | 2386.0844        | 1193.5459       | <b>1226.4929</b> | 613.7501         |
| Y       | 2549.1478        | 1275.0775       | 1066.4622        | 533.7347         |
| R       | 2705.2489        | 1353.1281       | 903.3989         | 452.2031         |
| N[Dea]  | 2820.2758        | 1410.6416       | 747.2978         | 374.1525         |
| G       | 2877.2973        | 1439.1523       | <b>632.2708</b>  | 316.6391         |
| I       | 2990.3814        | 1495.6943       | 575.2494         | 288.1283         |
| P       | 3087.4341        | 1544.2207       | <b>462.1653</b>  | 231.5863         |
| C[CAM]  | 3247.4648        | 1624.2360       | <b>365.1125</b>  | 183.0599         |
| G       | 3304.4862        | 1652.7468       | 205.0819         | 103.0446         |
| E       | 3433.5288        | 1717.2681       | <b>148.0604</b>  | 74.5339          |

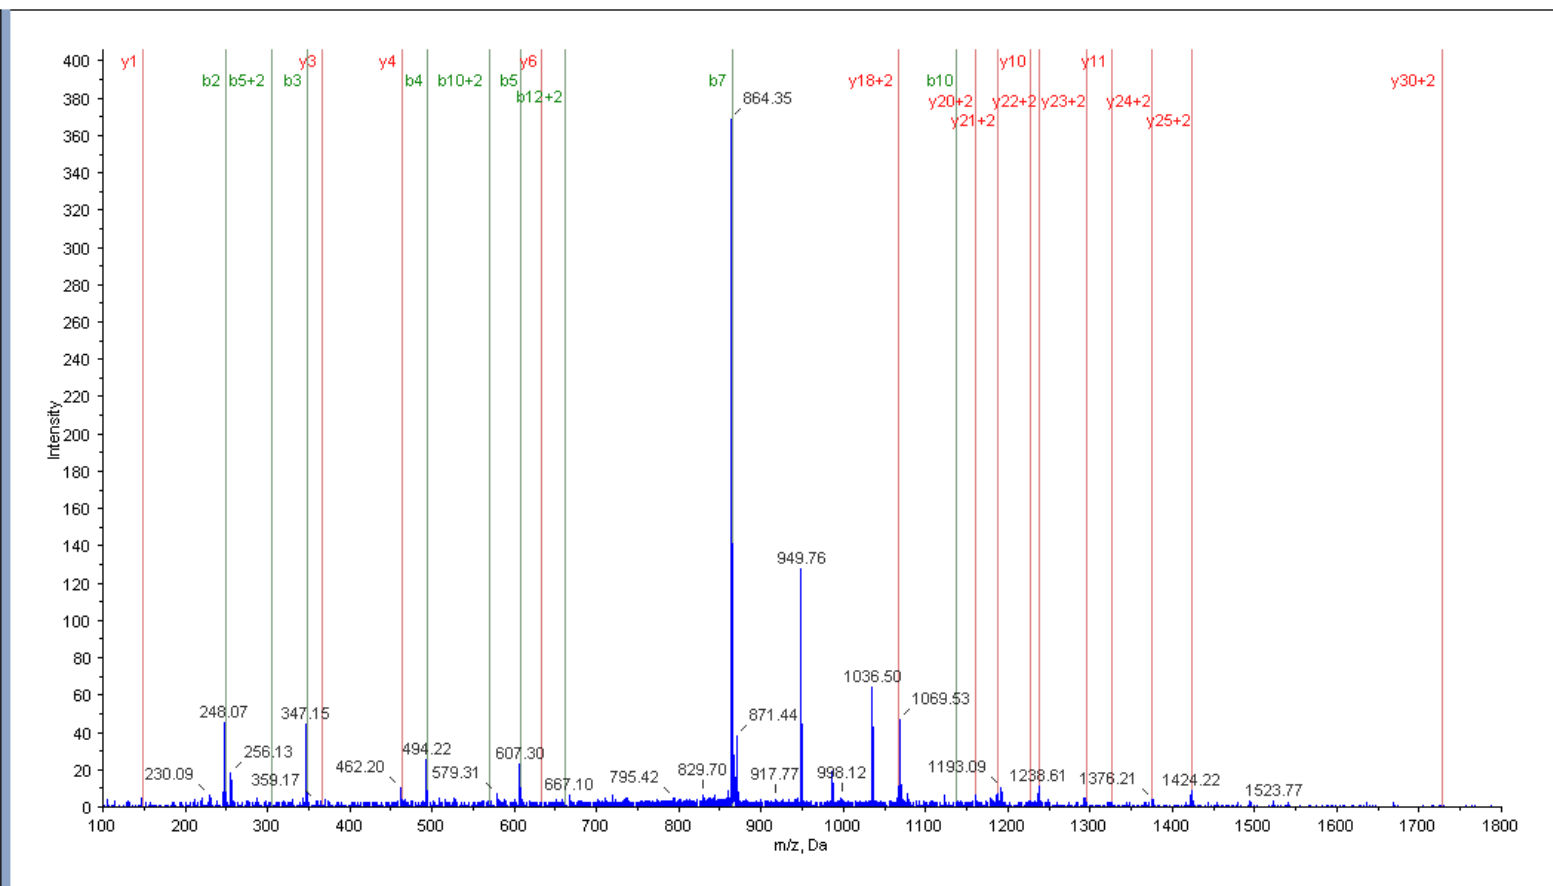

Supplementary spectrum E3a: MS/MS of  $m/z$  863.41 (mass 3449.62 Da) showing sequence ion coverage. The derived sequence is SCVFIPICITGIAGCSCKSKVCYRNGIPCGE.

### Fragmentation Evidence for Peptide

SC[CAM]VFIPC[CAM]ITGIAGC[CAM]S

| Residue | b                | b+2      | y                | y+2             |
|---------|------------------|----------|------------------|-----------------|
| S       | 88.0393          | 44.5233  | 1641.7433        | <b>821.3753</b> |
| C[CAM]  | <b>248.0700</b>  | 124.5386 | 1554.7113        | 777.8593        |
| V       | <b>347.1384</b>  | 174.0728 | 1394.6807        | 697.8440        |
| F       | <b>494.2068</b>  | 247.6070 | 1295.6123        | 648.3098        |
| I       | <b>607.2908</b>  | 304.1491 | <b>1148.5438</b> | 574.7756        |
| P       | 704.3436         | 352.6754 | <b>1035.4598</b> | 518.2335        |
| C[CAM]  | 864.3743         | 432.6908 | <b>938.4070</b>  | 469.7071        |
| I       | <b>977.4583</b>  | 489.2328 | 778.3764         | 389.6918        |
| T       | <b>1078.5060</b> | 539.7566 | <b>665.2923</b>  | 333.1498        |
| G       | 1135.5275        | 568.2674 | <b>564.2446</b>  | 282.6259        |
| I       | 1248.6115        | 624.8094 | 507.2232         | 254.1152        |
| A       | <b>1319.6486</b> | 660.3280 | 394.1391         | 197.5732        |
| G       | <b>1376.6701</b> | 688.8387 | <b>323.1020</b>  | 162.0546        |
| C[CAM]  | 1536.7008        | 768.8540 | <b>266.0805</b>  | 133.5439        |
| S       | 1623.7328        | 812.3700 | 106.0499         | 53.5286         |

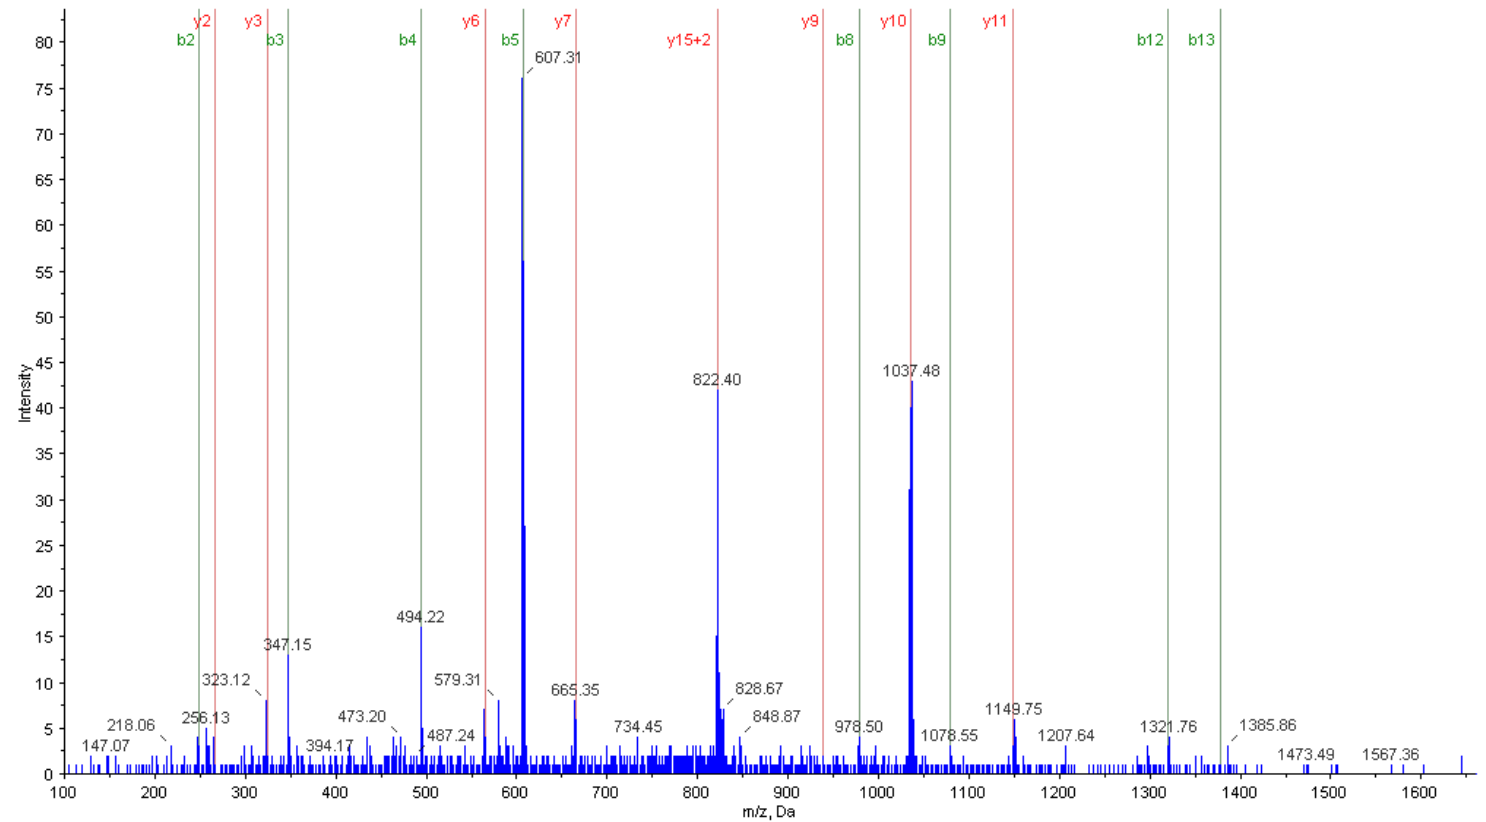

**Supplementary spectrum E3b:** MS/MS of  $m/z$  821.39 (mass 1640.77 Da) showing sequence ion coverage. The derived sequence is CVFIPCITGIAGCS.

### Fragmentation Evidence for Peptide

C[CAM]KSKVC[CAM]YRNGIPC[CAM]GE

| Residue | b         | b+2      | y         | y+2      |
|---------|-----------|----------|-----------|----------|
| C[CAM]  | 161.0379  | 81.0226  | 1827.8299 | 914.4186 |
| K       | 289.1329  | 145.0701 | 1667.7992 | 834.4032 |
| S       | 376.1649  | 188.5861 | 1539.7043 | 770.3558 |
| K       | 504.2599  | 252.6336 | 1452.6722 | 726.8398 |
| V       | 603.3283  | 302.1678 | 1324.5773 | 662.7923 |
| C[CAM]  | 763.3589  | 382.1831 | 1225.5089 | 613.2581 |
| Y       | 926.4223  | 463.7148 | 1065.4782 | 533.2427 |
| R       | 1082.5234 | 541.7653 | 902.4149  | 451.7111 |
| N       | 1196.5663 | 598.7868 | 746.3138  | 373.6605 |
| G       | 1253.5878 | 627.2975 | 632.2708  | 316.6391 |
| I       | 1366.6718 | 683.8396 | 575.2494  | 288.1283 |
| P       | 1463.7246 | 732.3659 | 462.1653  | 231.5863 |
| C[CAM]  | 1623.7552 | 812.3813 | 365.1125  | 183.0599 |
| G       | 1680.7767 | 840.8920 | 205.0819  | 103.0446 |
| E       | 1809.8193 | 905.4133 | 148.0604  | 74.5339  |

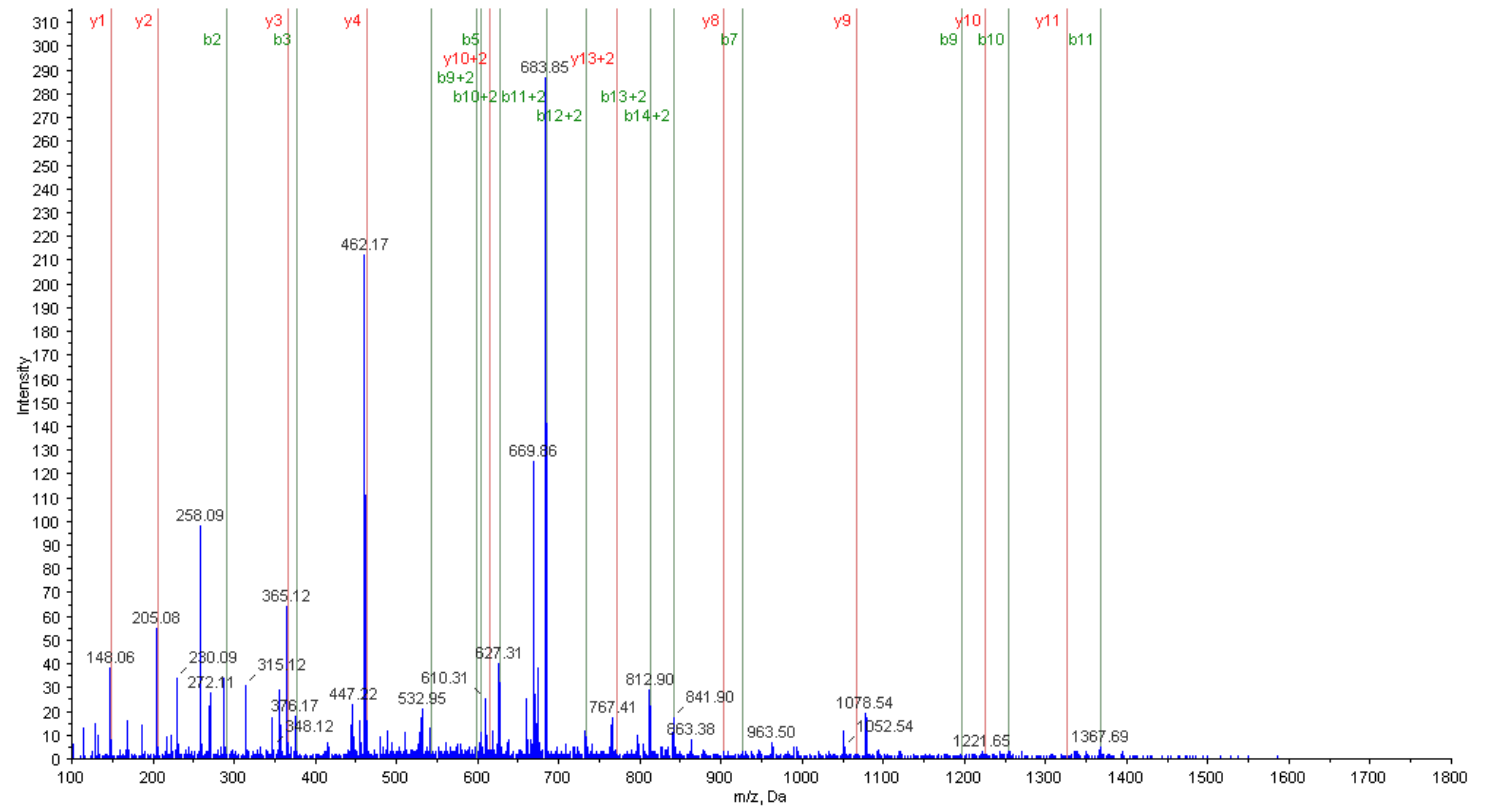

Supplementary spectrum E3c: MS/MS of  $m/z$  609.94 (mass 1826.81 Da) showing sequence ion coverage. The derived sequence is CKSKVCYRNGIPCGE.

**Chymotrypsin digest:**

RNGIPCGESCVFIPCI**TGIAGC**SCKSKVCY

**Fragmentation Evidence for Peptide**

RNGIPC[CAM]GESC[CAM]VF

| Residue | b                | b+2             | y               | y+2             |
|---------|------------------|-----------------|-----------------|-----------------|
| R       | 157.1084         | 79.0578         | 1395.6144       | <b>698.3108</b> |
| N       | <b>271.1513</b>  | 136.0793        | 1239.5133       | 620.2603        |
| G       | <b>328.1728</b>  | 164.5900        | 1125.4703       | 563.2388        |
| I       | <b>441.2568</b>  | 221.1321        | 1068.4489       | 534.7281        |
| P       | 538.3096         | 269.6584        | <b>955.3648</b> | 478.1860        |
| C[CAM]  | <b>698.3403</b>  | 349.6738        | 858.3121        | 429.6597        |
| G       | <b>755.3617</b>  | 378.1845        | <b>698.2814</b> | 349.6443        |
| E       | <b>884.4043</b>  | <b>442.7058</b> | 641.2599        | 321.1336        |
| S       | <b>971.4363</b>  | <b>486.2218</b> | <b>512.2173</b> | 256.6123        |
| C[CAM]  | <b>1131.4670</b> | <b>566.2371</b> | <b>425.1853</b> | 213.0963        |
| V       | <b>1230.5354</b> | <b>615.7713</b> | <b>265.1547</b> | <b>133.0810</b> |
| F       | 1377.6038        | 689.3055        | <b>166.0863</b> | 83.5468         |

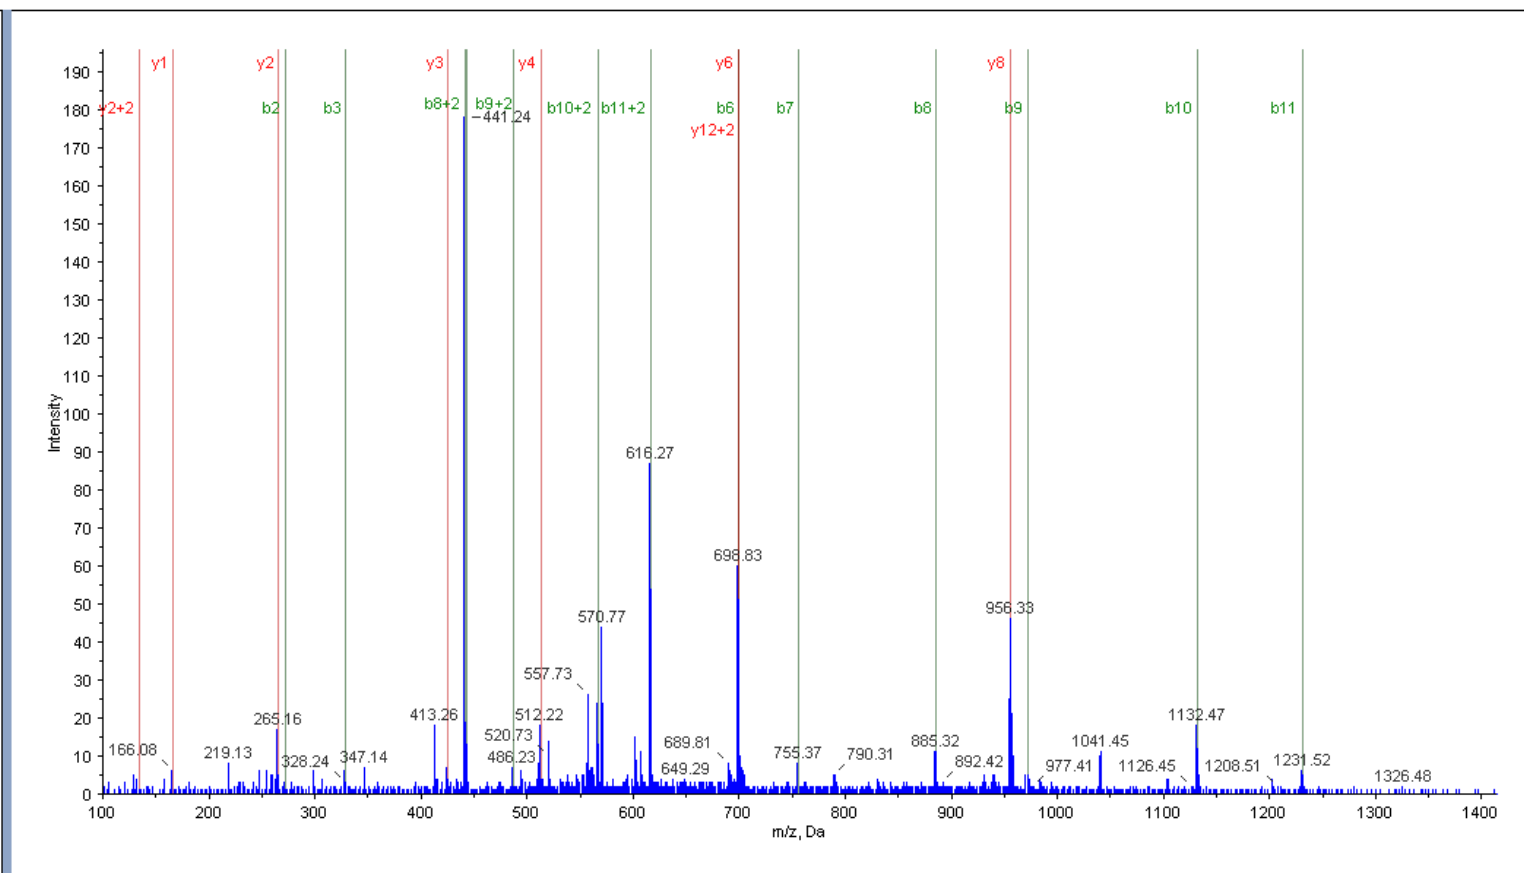

**Supplementary spectrum C3a:** MS/MS of  $m/z$  698.31 (mass 1394.60 Da) showing sequence ion coverage. The derived sequence is RNGIPCGESC VF.

Fragmentation Evidence for Peptide

IPC[CAM]ITGIAGC[CAM]

| Residue | b               | b+2             | y               | y+2             |
|---------|-----------------|-----------------|-----------------|-----------------|
| I       | 114.0913        | 57.5493         | 1061.5118       | <b>531.2595</b> |
| P       | 211.1441        | 106.0757        | 948.4277        | 474.7175        |
| C[CAM]  | <b>371.1748</b> | 186.0910        | 851.3750        | 426.1911        |
| I       | <b>484.2588</b> | 242.6330        | 691.3443        | 346.1758        |
| T       | <b>585.3065</b> | 293.1569        | <b>578.2603</b> | 289.6338        |
| G       | <b>642.3280</b> | 321.6676        | <b>477.2126</b> | 239.1099        |
| I       | <b>755.4120</b> | 378.2096        | <b>420.1911</b> | 210.5992        |
| A       | <b>826.4491</b> | <b>413.7282</b> | <b>307.1071</b> | 154.0572        |
| G       | 883.4706        | <b>442.2389</b> | <b>236.0700</b> | 118.5386        |
| C[CAM]  | 1043.5012       | <b>522.2543</b> | <b>179.0485</b> | 90.0279         |

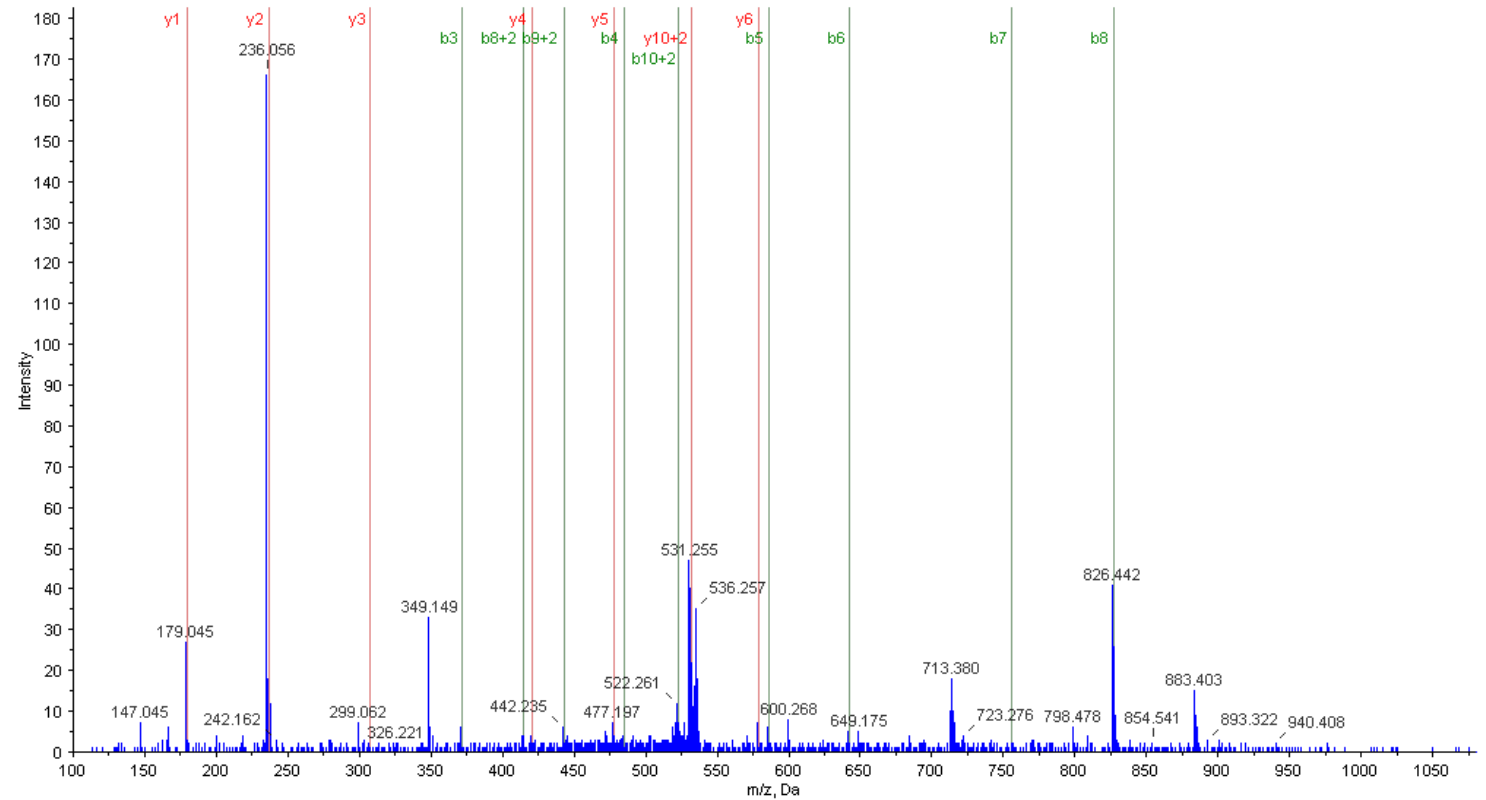

Supplementary spectrum C3b: MS/MS of  $m/z$  531.25 (mass 1060.49 Da) showing sequence ion coverage. The derived sequence is IPCITGIAGC.

## Evidence for Cter P:

### Endoproteinase Glu-C digest:

**SCVFIPICITAAIGCSCKSKVCYRNGIPCGE**

NB: This peptide shows 96% sequence homology to cyclotide A (D2WPK4) from *Gloeospermum blakeanum*.

```

1  GIPCGESCVFIPICITAAIGCSCKSKVCYRN  30  Cter_P
1  GIPCGESCVFIPICITAAIGCSCKTKVCYRN  30  Cyclotide-A
*****.*****
  
```

### Fragmentation Evidence for Peptide

SC[CAM]VFIP[CAM]ITAAIG[CAM]CSCKVC[CAM]YRN[Dea]GIP[CAM]CGE

| Residue | b               | b+2             | y               | y+2              |
|---------|-----------------|-----------------|-----------------|------------------|
| S       | 88.0393         | 44.5233         | 3465.5550       | 1733.2812        |
| C[CAM]  | <b>248.0700</b> | 124.5386        | 3378.5230       | 1689.7651        |
| V       | <b>347.1384</b> | 174.0728        | 3218.4924       | 1609.7498        |
| F       | <b>494.2068</b> | 247.6070        | 3119.4239       | 1560.2156        |
| I       | <b>607.2908</b> | 304.1491        | 2972.3555       | 1486.6814        |
| P       | 704.3436        | 352.6754        | 2859.2715       | <b>1430.1394</b> |
| C[CAM]  | 864.3743        | 432.6908        | 2762.2187       | <b>1381.6130</b> |
| L       | 977.4583        | 489.2328        | 2602.1881       | 1301.5977        |
| T       | 1078.5060       | 539.7566        | 2489.1040       | <b>1245.0556</b> |
| A       | 1149.5431       | <b>575.2752</b> | 2388.0563       | <b>1194.5318</b> |
| A       | 1220.5802       | 610.7938        | 2317.0192       | 1159.0132        |
| I       | 1333.6643       | 667.3358        | 2245.9821       | 1123.4947        |
| G       | 1390.6858       | 695.8465        | 2132.8980       | <b>1066.9527</b> |
| C[CAM]  | 1550.7164       | 775.8618        | 2075.8766       | 1038.4419        |
| S       | 1637.7484       | 819.3779        | 1915.8459       | 958.4266         |
| C[CAM]  | 1797.7791       | 899.3932        | 1828.8139       | 914.9106         |
| K       | 1925.8740       | 963.4407        | 1668.7832       | 834.8953         |
| S       | 2012.9061       | 1006.9567       | 1540.6883       | 770.8478         |
| K       | 2141.0010       | 1071.0042       | 1453.6562       | 727.3318         |
| V       | 2240.0694       | 1120.5384       | 1325.5613       | 663.2843         |
| C[CAM]  | 2400.1001       | 1200.5537       | 1226.4929       | 613.7501         |
| Y       | 2563.1634       | 1282.0854       | 1066.4622       | 533.7347         |
| R       | 2719.2645       | 1360.1359       | 903.3988        | 452.2031         |
| N[Dea]  | 2834.2915       | 1417.6494       | 747.2978        | 374.1525         |
| G       | 2891.3129       | 1446.1601       | 632.2708        | 316.6391         |
| I       | 3004.3970       | 1502.7021       | <b>575.2494</b> | 288.1283         |
| P       | 3101.4498       | 1551.2285       | <b>462.1653</b> | 231.5863         |
| C[CAM]  | 3261.4804       | 1631.2438       | <b>365.1125</b> | 183.0599         |
| G       | 3318.5019       | 1659.7546       | 205.0819        | 103.0446         |
| E       | 3447.5445       | 1724.2759       | 148.0604        | 74.5339          |

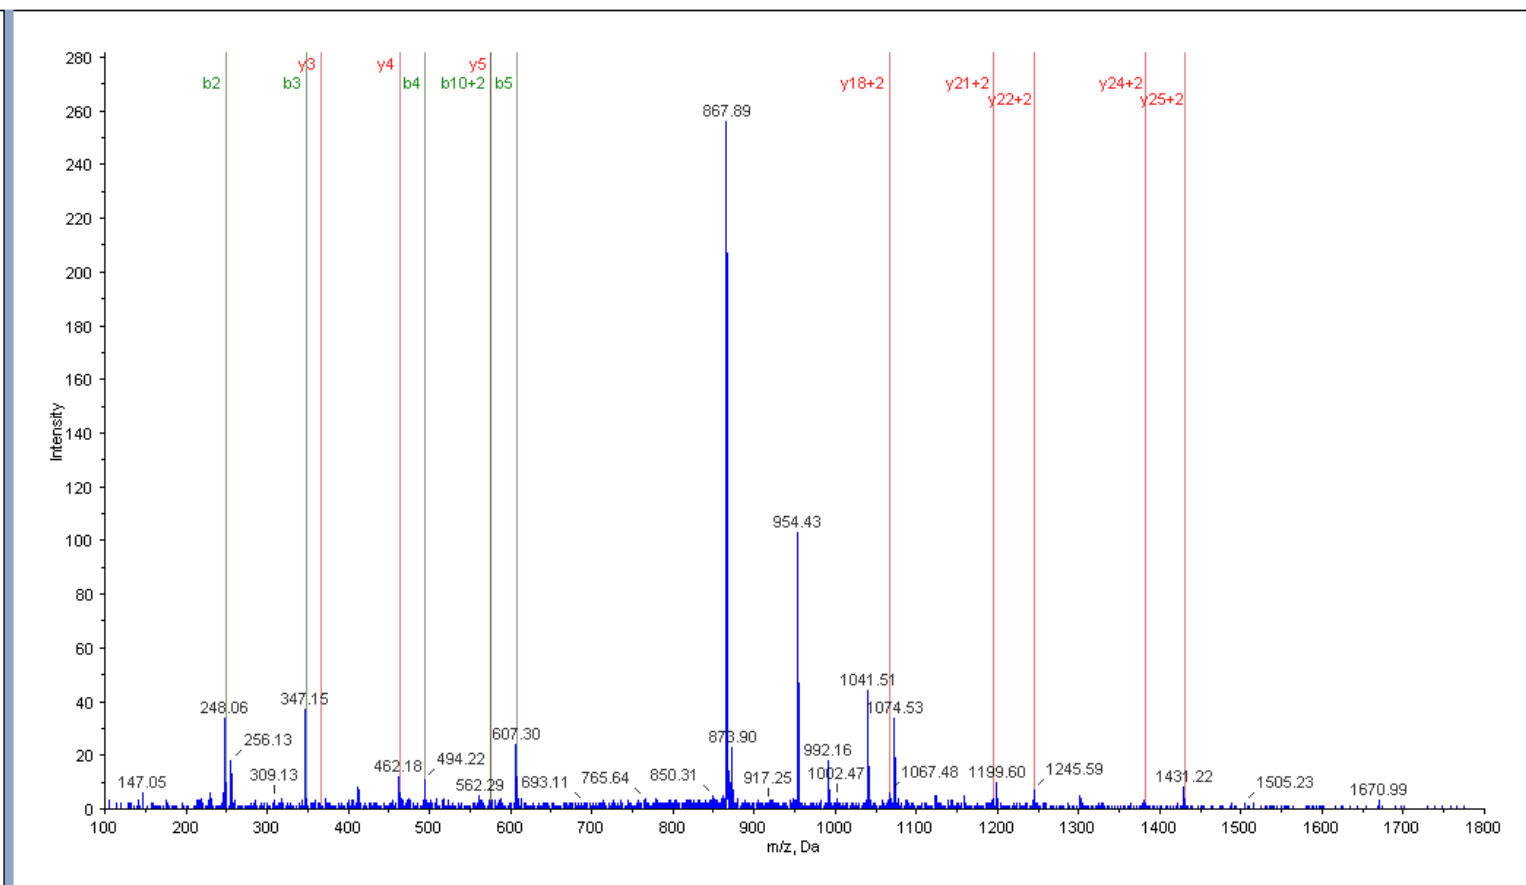

Supplementary spectrum E4a: MS/MS of  $m/z$  866.90 (mass 3463.58 Da) showing sequence ion coverage. The derived sequence is SCVFIPICITAAIGCSCKSKVCYRNGIPCGE.



Fragmentation Evidence for Peptide

SC[CAM]VFIPC[CAM]LTAAGC[CAM]S

| Residue | b                | b+2             | y                | y+2             |
|---------|------------------|-----------------|------------------|-----------------|
| S       | 88.0393          | 44.5233         | 1655.7590        | <b>828.3831</b> |
| C[CAM]  | <b>248.0700</b>  | 124.5386        | 1568.7270        | 784.8671        |
| V       | <b>347.1384</b>  | 174.0728        | 1408.6963        | 704.8518        |
| F       | <b>494.2068</b>  | 247.6070        | <b>1309.6279</b> | 655.3176        |
| I       | <b>607.2908</b>  | 304.1491        | <b>1162.5595</b> | 581.7834        |
| P       | 704.3436         | 352.6754        | <b>1049.4754</b> | 525.2414        |
| C[CAM]  | <b>864.3743</b>  | 432.6908        | <b>952.4227</b>  | 476.7150        |
| L       | <b>977.4583</b>  | 489.2328        | <b>792.3920</b>  | 396.6996        |
| T       | <b>1078.5060</b> | 539.7566        | <b>679.3080</b>  | 340.1576        |
| A       | <b>1149.5431</b> | 575.2752        | <b>578.2603</b>  | 289.6338        |
| A       | <b>1220.5802</b> | 610.7938        | <b>507.2232</b>  | 254.1152        |
| I       | <b>1333.6643</b> | 667.3358        | <b>436.1860</b>  | 218.5967        |
| G       | 1390.6858        | 695.8465        | <b>323.1020</b>  | 162.0546        |
| C[CAM]  | 1550.7164        | <b>775.8618</b> | <b>266.0805</b>  | 133.5439        |
| S       | 1637.7484        | 819.3779        | 106.0499         | 53.5286         |

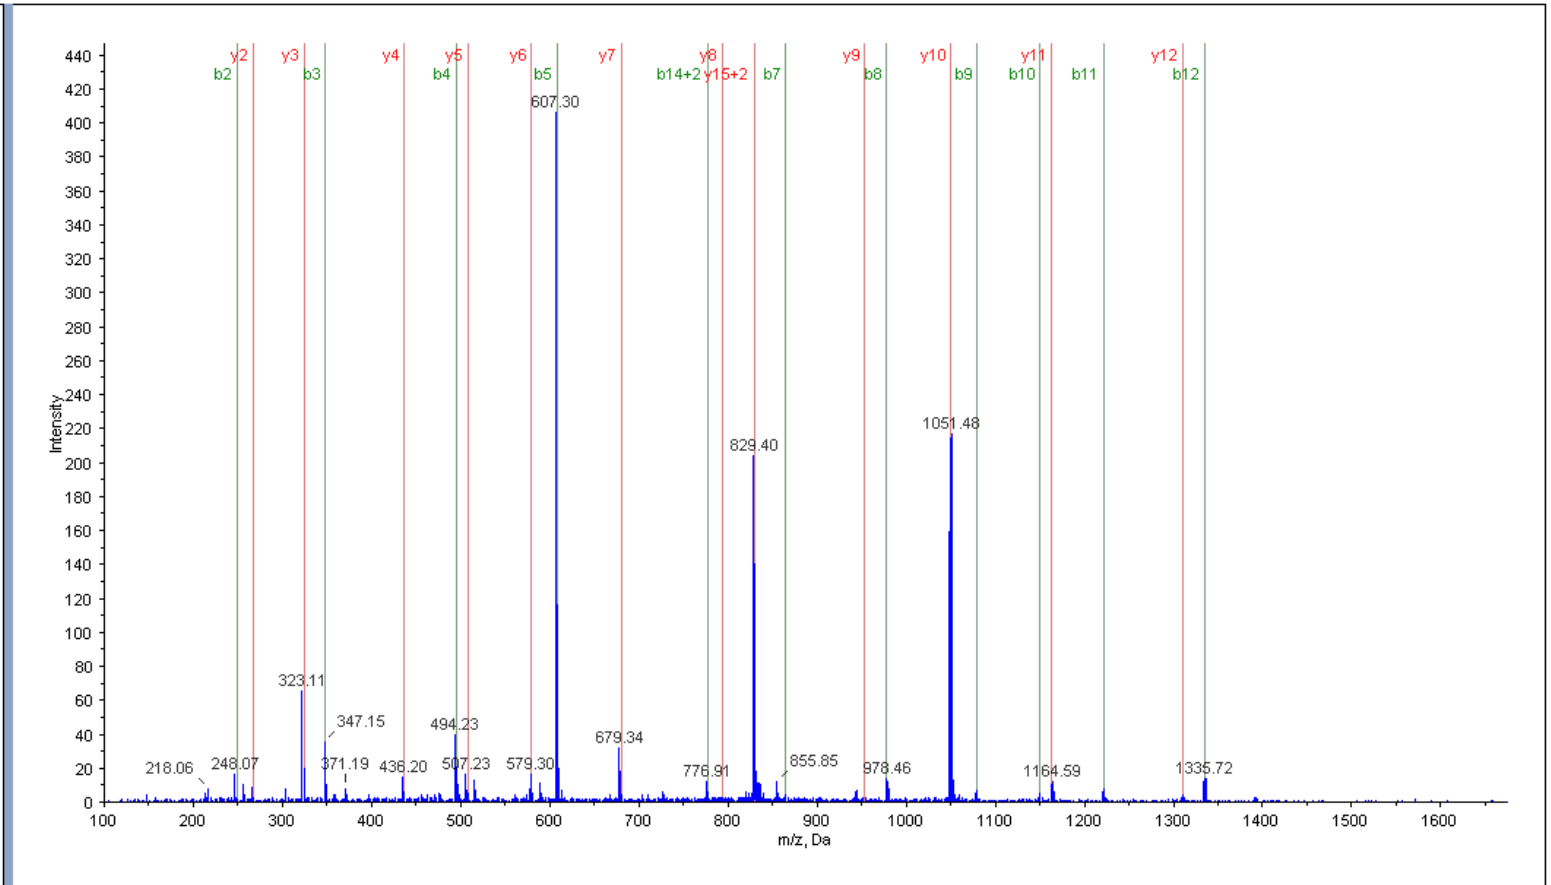

Supplementary spectrum E4b: MS/MS of m/z 828.39 (mass 1654.78 Da) showing sequence ion coverage. The derived sequence is SCVFIPCITAAIGCS.

Fragmentation Evidence for Peptide

[C[CAM]KSKVC[CAM]YRNGIPC[CAM]GE

| Residue | b         | b+2      | y         | y+2      |
|---------|-----------|----------|-----------|----------|
| C[CAM]  | 161.0379  | 81.0226  | 1827.8299 | 914.4186 |
| K       | 289.1329  | 145.0701 | 1667.7992 | 834.4032 |
| S       | 376.1649  | 188.5861 | 1539.7043 | 770.3558 |
| K       | 504.2599  | 252.6336 | 1452.6722 | 726.8398 |
| V       | 603.3283  | 302.1678 | 1324.5773 | 662.7923 |
| C[CAM]  | 763.3589  | 382.1831 | 1225.5089 | 613.2581 |
| Y       | 926.4223  | 463.7148 | 1065.4782 | 533.2427 |
| R       | 1082.5234 | 541.7653 | 902.4149  | 451.7111 |
| N       | 1196.5663 | 598.7868 | 746.3138  | 373.6605 |
| G       | 1253.5878 | 627.2975 | 632.2708  | 316.6391 |
| I       | 1366.6718 | 683.8396 | 575.2494  | 288.1283 |
| P       | 1463.7246 | 732.3659 | 462.1653  | 231.5863 |
| C[CAM]  | 1623.7552 | 812.3813 | 365.1125  | 183.0599 |
| G       | 1680.7767 | 840.8920 | 205.0819  | 103.0446 |
| E       | 1809.8193 | 905.4133 | 148.0604  | 74.5339  |

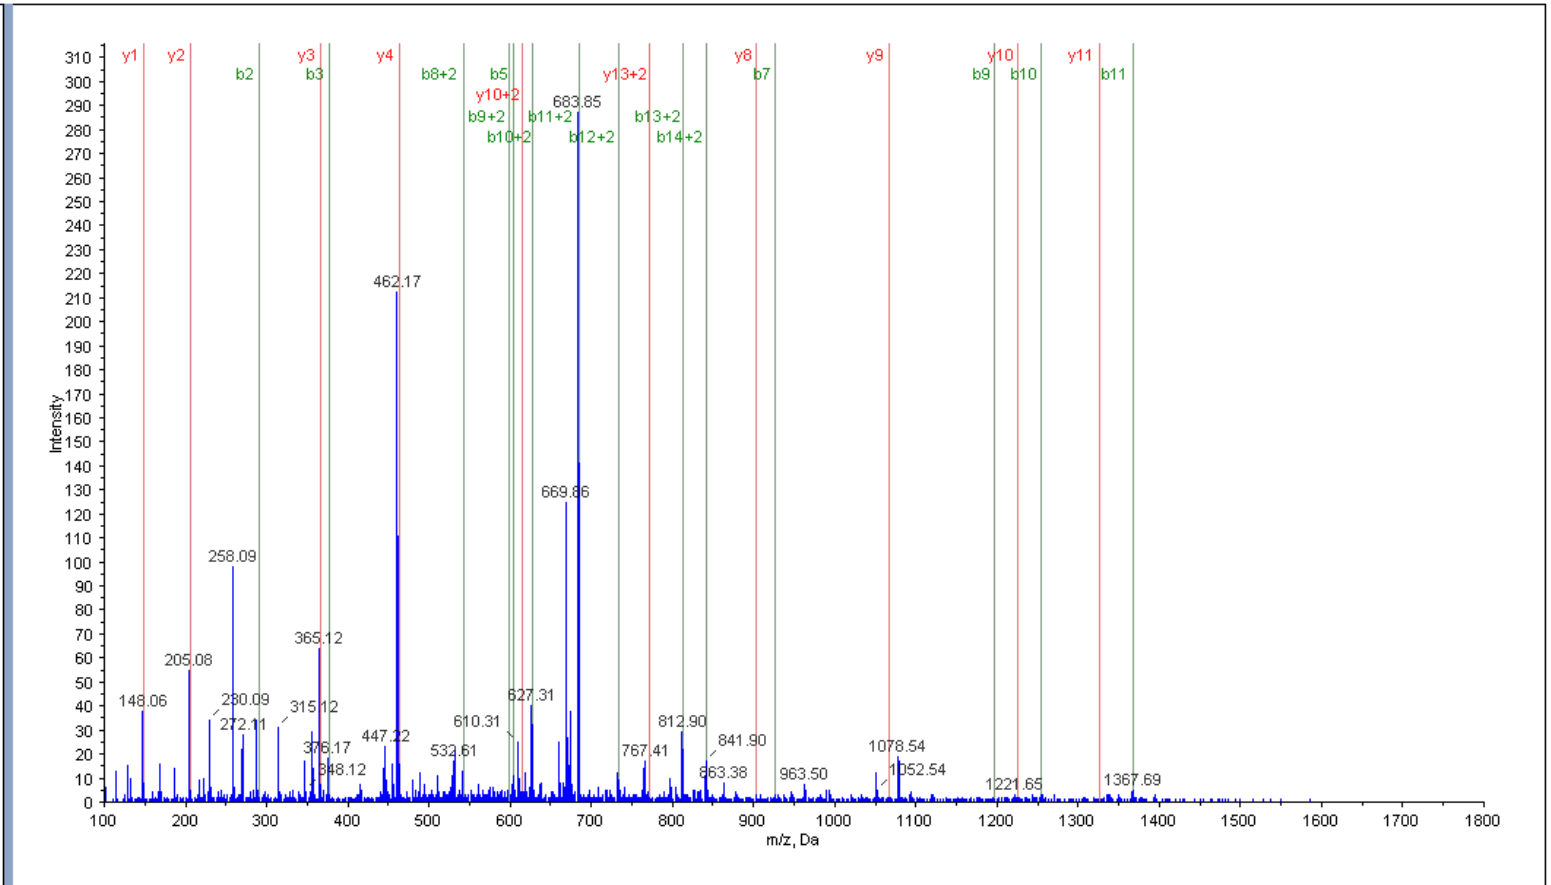

Supplementary spectrum E4c: MS/MS of  $m/z$  609.94 (mass 1826.81 Da) showing sequence ion coverage. The derived sequence is CKSKVCYRNGIPCGE.

**Chymotrypsin digest:**

**RNGIPCGESC**VFIPCLTAAIGCSCKSKVCY

**Fragmentation Evidence for Peptide**

RNGIP[CAM]GESC[CAM]VF

| Residue | b         | b+2      | y         | y+2      |
|---------|-----------|----------|-----------|----------|
| R       | 157.1084  | 79.0578  | 1395.6144 | 698.3108 |
| N       | 271.1513  | 136.0793 | 1239.5133 | 620.2603 |
| G       | 328.1728  | 164.5900 | 1125.4703 | 563.2388 |
| I       | 441.2568  | 221.1321 | 1068.4489 | 534.7281 |
| P       | 538.3096  | 269.6584 | 955.3648  | 478.1860 |
| C[CAM]  | 698.3403  | 349.6738 | 858.3121  | 429.6597 |
| G       | 755.3617  | 378.1845 | 698.2814  | 349.6443 |
| E       | 884.4043  | 442.7058 | 641.2599  | 321.1336 |
| S       | 971.4363  | 486.2218 | 512.2173  | 256.6123 |
| C[CAM]  | 1131.4670 | 566.2371 | 425.1853  | 213.0963 |
| V       | 1230.5354 | 615.7713 | 265.1547  | 133.0810 |
| F       | 1377.6038 | 689.3055 | 166.0863  | 83.5468  |

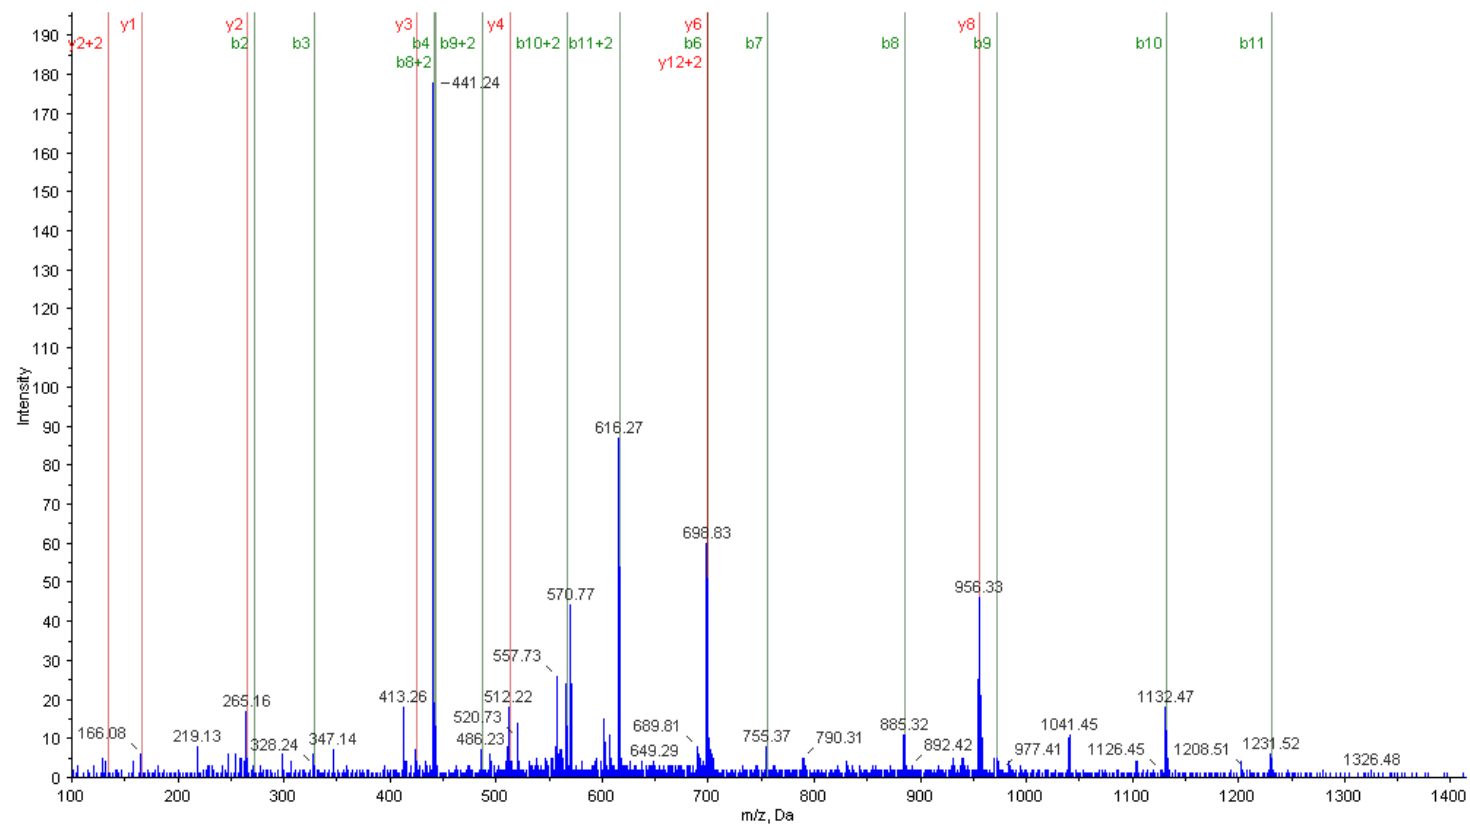

**Supplementary spectrum C4a:** MS/MS of  $m/z$  698.31 (mass 1394.60 Da) showing sequence ion coverage. The derived sequence is RNGIPCGESC**VF**.

### Fragmentation Evidence for Peptide

IPC[CAM]ITGIAGC[CAM]

| Residue | b         | b+2      | y         | y+2      |
|---------|-----------|----------|-----------|----------|
| I       | 114.0913  | 57.5493  | 1061.5118 | 531.2595 |
| P       | 211.1441  | 106.0757 | 948.4277  | 474.7175 |
| C[CAM]  | 371.1748  | 186.0910 | 851.3750  | 426.1911 |
| I       | 484.2588  | 242.6330 | 691.3443  | 346.1758 |
| T       | 585.3065  | 293.1569 | 578.2603  | 289.6338 |
| G       | 642.3280  | 321.6676 | 477.2126  | 239.1099 |
| I       | 755.4120  | 378.2096 | 420.1911  | 210.5992 |
| A       | 826.4491  | 413.7282 | 307.1071  | 154.0572 |
| G       | 883.4706  | 442.2389 | 236.0700  | 118.5386 |
| C[CAM]  | 1043.5012 | 522.2543 | 179.0485  | 90.0279  |

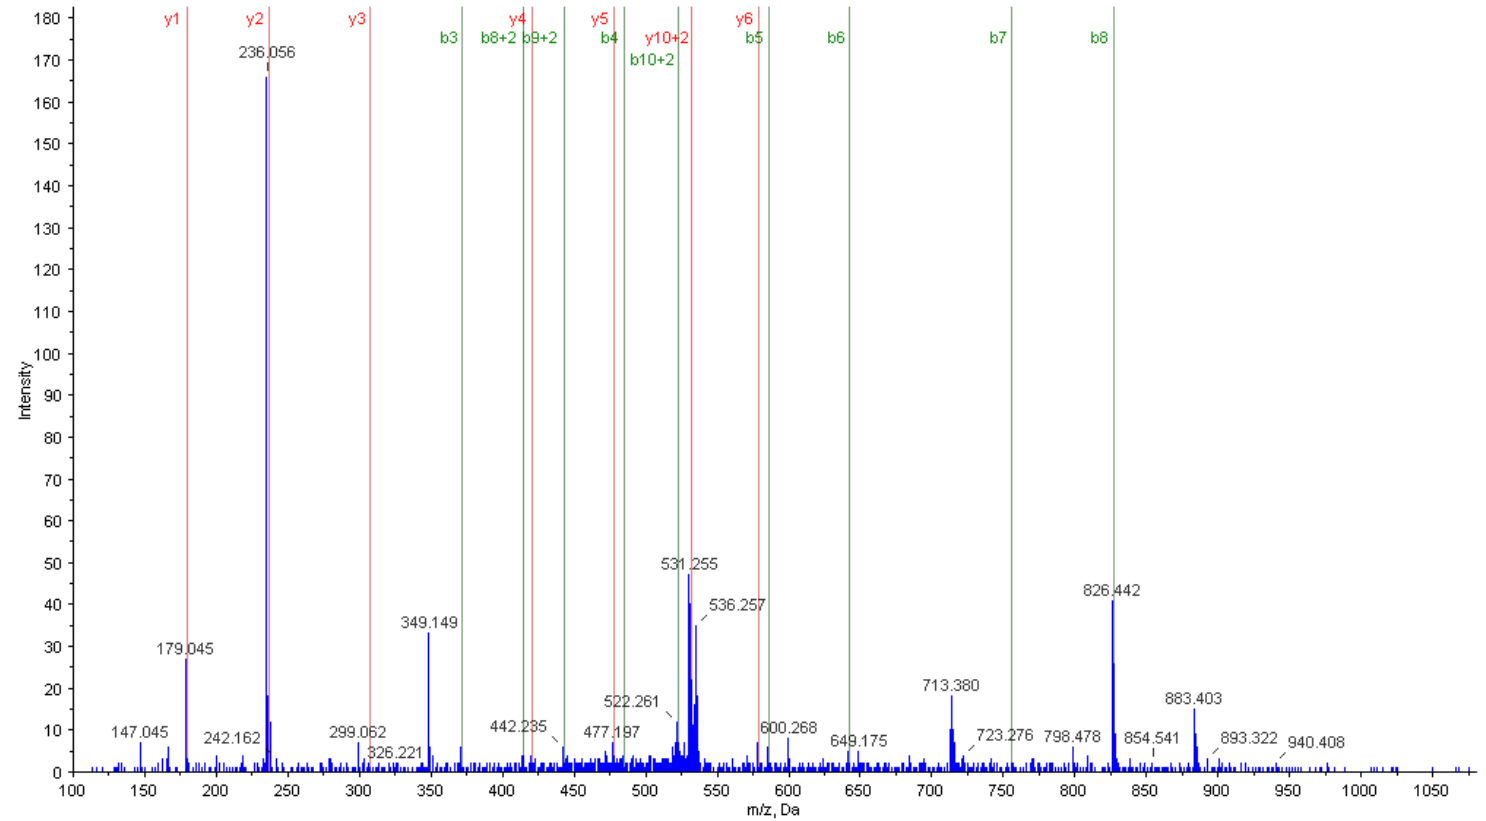

**Supplementary spectrum C4b:** MS/MS of  $m/z$  531.25 (mass 1060.49 Da) showing sequence ion coverage. The derived sequence is IPCITGIAGC.

## Evidence for Cter Q:

### Endoproteinase Glu-C digest:

**SCVFIPCISTVIGCSCKNKVCYRNGIPCGE**

NB: This peptide shows 93% sequence homology to cyclotide I (Q30CB5) from *Hybanthus floribundus*.

```

1  GIPCGESC VFIPCISTVIGCSCKNKVCYRN 30 Cter_Q
1  GIPCGESC VFIPCISGVIGCSCKSKVCYRN 30 Cyclotide-I
*****

```

### Fragmentation Evidence for Peptide

[S[CAM]VFIPC[CAM]ISTVIG[CAM]SC[CAM]KNKVC[CAM]YRN[Dea]GIPC[CAM]GE

| Residue | b                | b+2              | y                | y+2              |
|---------|------------------|------------------|------------------|------------------|
| S       | 88.0393          | 44.5233          | 3536.5922        | 1768.7997        |
| C[CAM]  | <b>248.0700</b>  | 124.5386         | 3449.5601        | 1725.2837        |
| V       | <b>347.1384</b>  | 174.0728         | 3289.5295        | 1645.2684        |
| F       | <b>494.2068</b>  | 247.6070         | 3190.4611        | 1595.7342        |
| I       | <b>607.2908</b>  | 304.1491         | 3043.3926        | 1522.2000        |
| P       | 704.3436         | 352.6754         | 2930.3086        | <b>1465.6579</b> |
| C[CAM]  | 864.3743         | 432.6908         | 2833.2558        | 1417.1315        |
| I       | <b>977.4583</b>  | 489.2328         | 2673.2252        | <b>1337.1162</b> |
| S       | <b>1064.4903</b> | 532.7488         | 2560.1411        | <b>1280.5742</b> |
| T       | 1165.5380        | 583.2727         | 2473.1091        | 1237.0582        |
| V       | 1264.6064        | 632.8069         | 2372.0614        | 1186.5343        |
| I       | 1377.6905        | 689.3489         | 2272.9930        | <b>1137.0001</b> |
| G       | 1434.7120        | 717.8596         | 2159.9089        | 1080.4581        |
| C[CAM]  | 1594.7426        | 797.8749         | 2102.8875        | 1051.9474        |
| S       | 1681.7746        | 841.3910         | 1942.8568        | 971.9320         |
| C[CAM]  | 1841.8053        | 921.4063         | 1855.8248        | 928.4160         |
| K       | 1969.9003        | 985.4538         | 1695.7941        | 848.4007         |
| N       | 2083.9432        | 1042.4752        | 1567.6992        | 784.3532         |
| K       | 2212.0381        | 1106.5227        | <b>1453.6562</b> | 727.3318         |
| V       | 2311.1066        | 1156.0569        | 1325.5613        | 663.2843         |
| C[CAM]  | 2471.1372        | <b>1236.0722</b> | 1226.4929        | 613.7501         |
| Y       | 2634.2005        | 1317.6039        | 1066.4622        | 533.7347         |
| R       | 2790.3016        | 1395.6545        | 903.3989         | 452.2031         |
| N[Dea]  | 2905.3286        | 1453.1679        | 747.2978         | 374.1525         |
| G       | 2962.3501        | 1481.6787        | 632.2708         | 316.6391         |
| I       | 3075.4341        | 1538.2207        | 575.2494         | 288.1283         |
| P       | 3172.4869        | 1586.7471        | <b>462.1653</b>  | 231.5863         |
| C[CAM]  | 3332.5175        | 1666.7624        | <b>365.1125</b>  | 183.0599         |
| G       | 3389.5390        | 1695.2731        | 205.0819         | 103.0446         |
| E       | 3518.5816        | 1759.7944        | 148.0604         | 74.5339          |

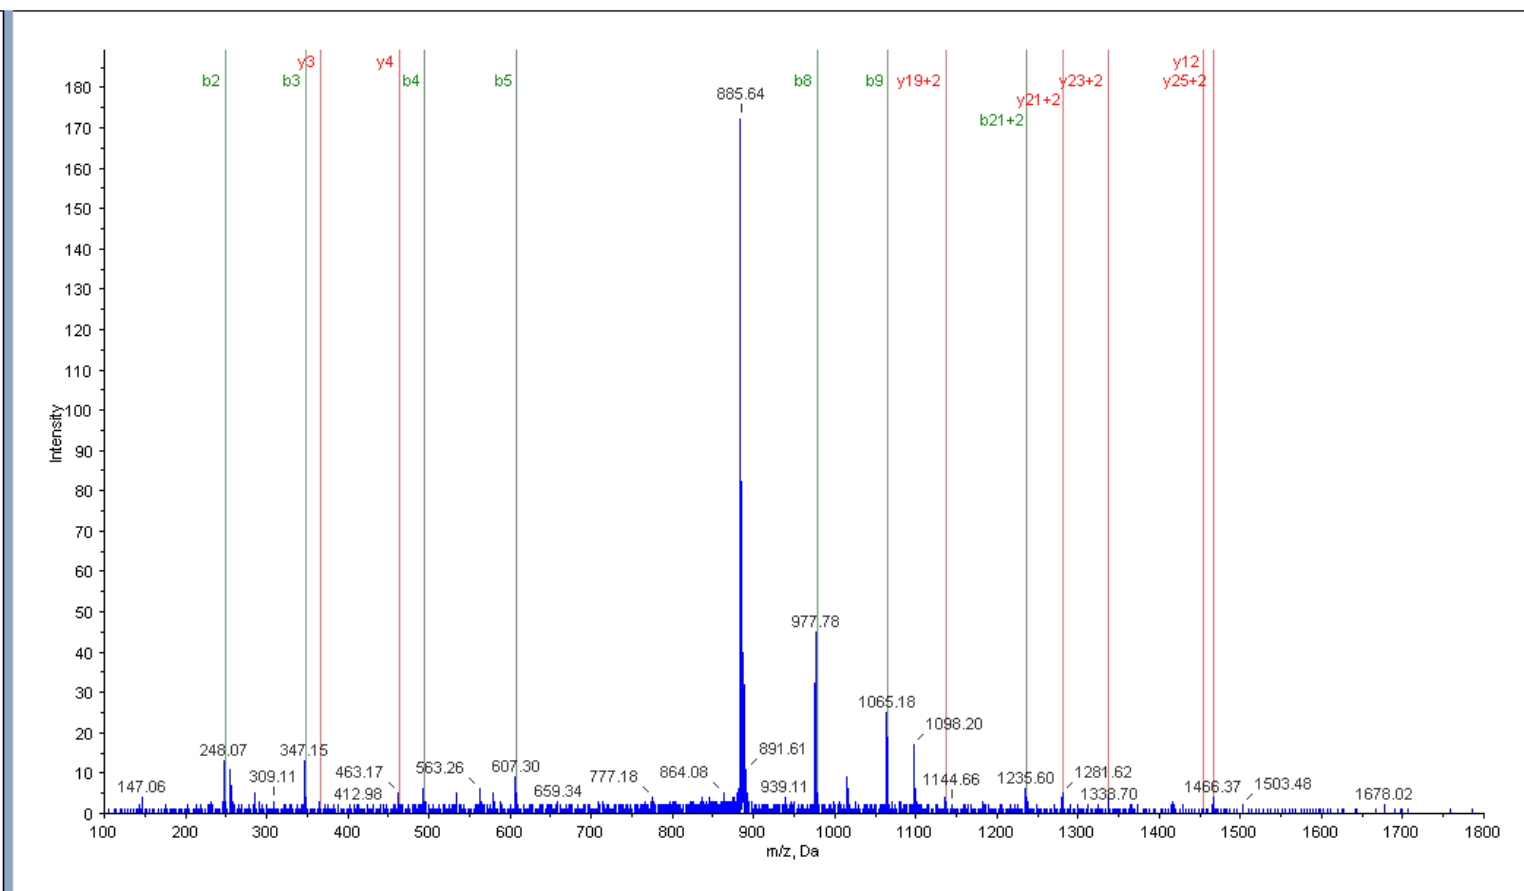

Supplementary spectrum E5a: MS/MS of  $m/z$  884.60 (mass 3534.61 Da) showing sequence ion coverage. The derived sequence is SCVFIPCISTVIGCSCKNKVCYRNGIPCGE.

### Fragmentation Evidence for Peptide

SC[CAM]VFIPC[CAM]ISTVIGC[CAM]S

| Residue | b                | b+2             | y                | y+2             |
|---------|------------------|-----------------|------------------|-----------------|
| S       | 88.0393          | 44.5233         | 1699.7852        | <b>850.3962</b> |
| C[CAM]  | <b>248.0700</b>  | 124.5386        | 1612.7532        | 806.8802        |
| V       | <b>347.1384</b>  | 174.0728        | 1452.7225        | 726.8649        |
| F       | <b>494.2068</b>  | 247.6070        | <b>1353.6541</b> | 677.3307        |
| I       | <b>607.2908</b>  | <b>304.1491</b> | <b>1206.5857</b> | 603.7965        |
| P       | 704.3436         | 352.6754        | <b>1093.5016</b> | 547.2545        |
| C[CAM]  | 864.3743         | 432.6908        | <b>996.4489</b>  | 498.7281        |
| I       | <b>977.4583</b>  | 489.2328        | <b>836.4182</b>  | 418.7128        |
| S       | 1064.4903        | 532.7488        | <b>723.3342</b>  | 362.1707        |
| T       | <b>1165.5380</b> | 583.2727        | <b>636.3021</b>  | 318.6547        |
| V       | <b>1264.6064</b> | 632.8069        | 535.2545         | 268.1309        |
| I       | <b>1377.6905</b> | <b>689.3489</b> | <b>436.1860</b>  | 218.5967        |
| G       | 1434.7120        | 717.8596        | <b>323.1020</b>  | 162.0546        |
| C[CAM]  | 1594.7426        | 797.8749        | <b>266.0805</b>  | 133.5439        |
| S       | 1681.7746        | 841.3910        | 106.0499         | 53.5286         |

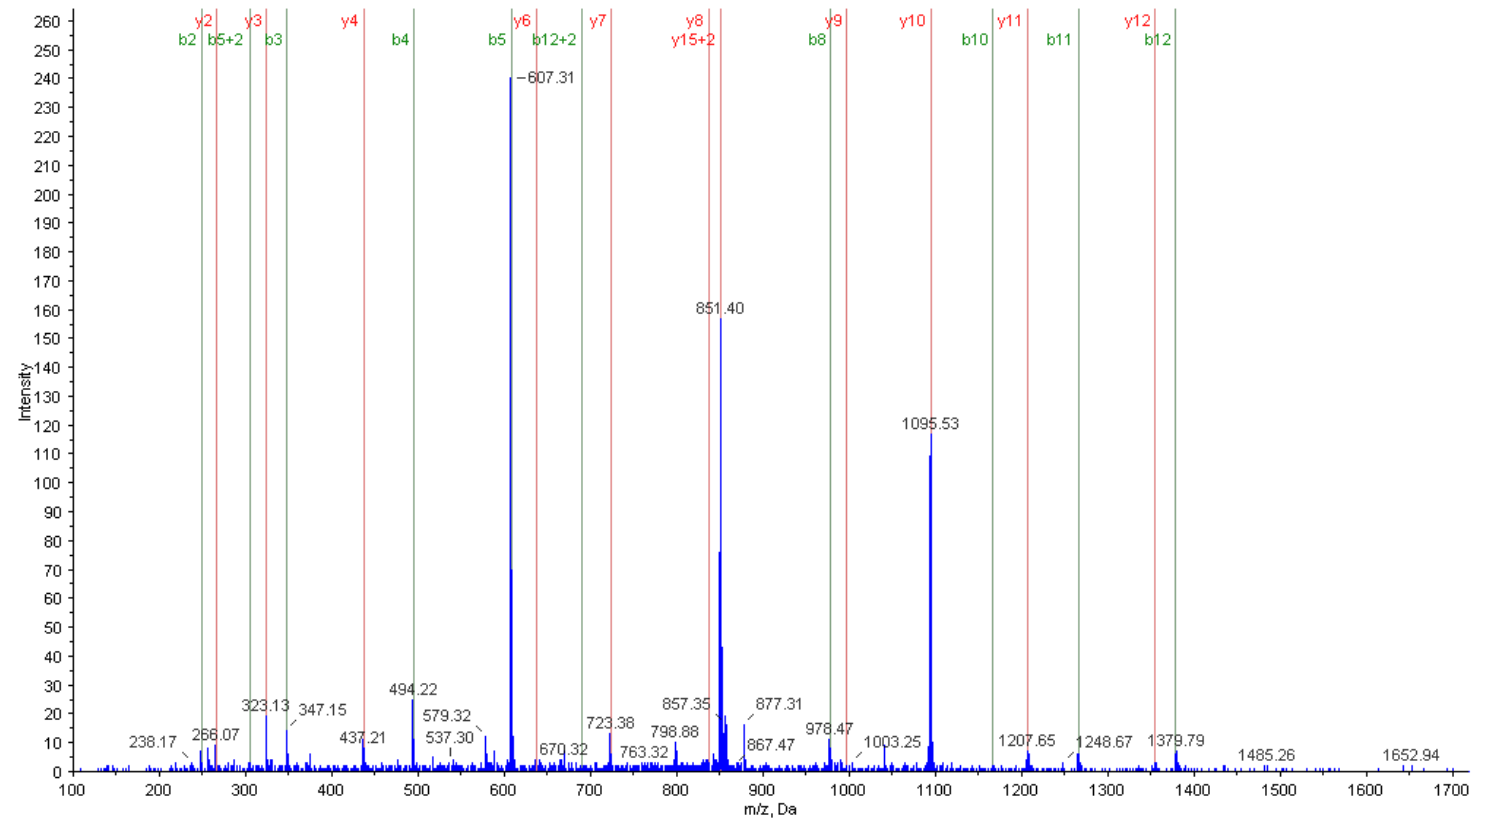

**Supplementary spectrum E5b:** MS/MS of  $m/z$  850.41 (mass 1698.81 Da) showing sequence ion coverage. The derived sequence is SCVFIPCISTVIGCS.

### Fragmentation Evidence for Peptide

[C[CAM]K<sup>+</sup>KNKVC[CAM]YRNGIPC[CAM]GE

| Residue | b                | b+2             | y                | y+2             |
|---------|------------------|-----------------|------------------|-----------------|
| C[CAM]  | 161.0379         | 81.0226         | 1854.8408        | 927.9240        |
| K       | <b>289.1329</b>  | 145.0701        | 1694.8101        | 847.9087        |
| N       | <b>403.1758</b>  | 202.0915        | 1566.7152        | 783.8612        |
| K       | 531.2708         | 266.1390        | 1452.6722        | 726.8398        |
| V       | 630.3392         | 315.6732        | 1324.5773        | 662.7923        |
| C[CAM]  | 790.3698         | 395.6886        | 1225.5089        | <b>613.2581</b> |
| Y       | 953.4332         | <b>477.2202</b> | <b>1065.4782</b> | 533.2427        |
| R       | 1109.5343        | 555.2708        | 902.4149         | 451.7111        |
| N       | 1223.5772        | 612.2922        | 746.3138         | 373.6605        |
| G       | <b>1280.5987</b> | <b>640.8030</b> | <b>632.2708</b>  | 316.6391        |
| I       | <b>1393.6827</b> | <b>697.3450</b> | 575.2494         | 288.1283        |
| P       | 1490.7355        | <b>745.8714</b> | <b>462.1653</b>  | 231.5863        |
| C[CAM]  | 1650.7661        | <b>825.8867</b> | <b>365.1125</b>  | 183.0599        |
| G       | 1707.7876        | <b>854.3974</b> | <b>205.0819</b>  | 103.0446        |
| E       | 1836.8302        | 918.9187        | <b>148.0604</b>  | 74.5339         |

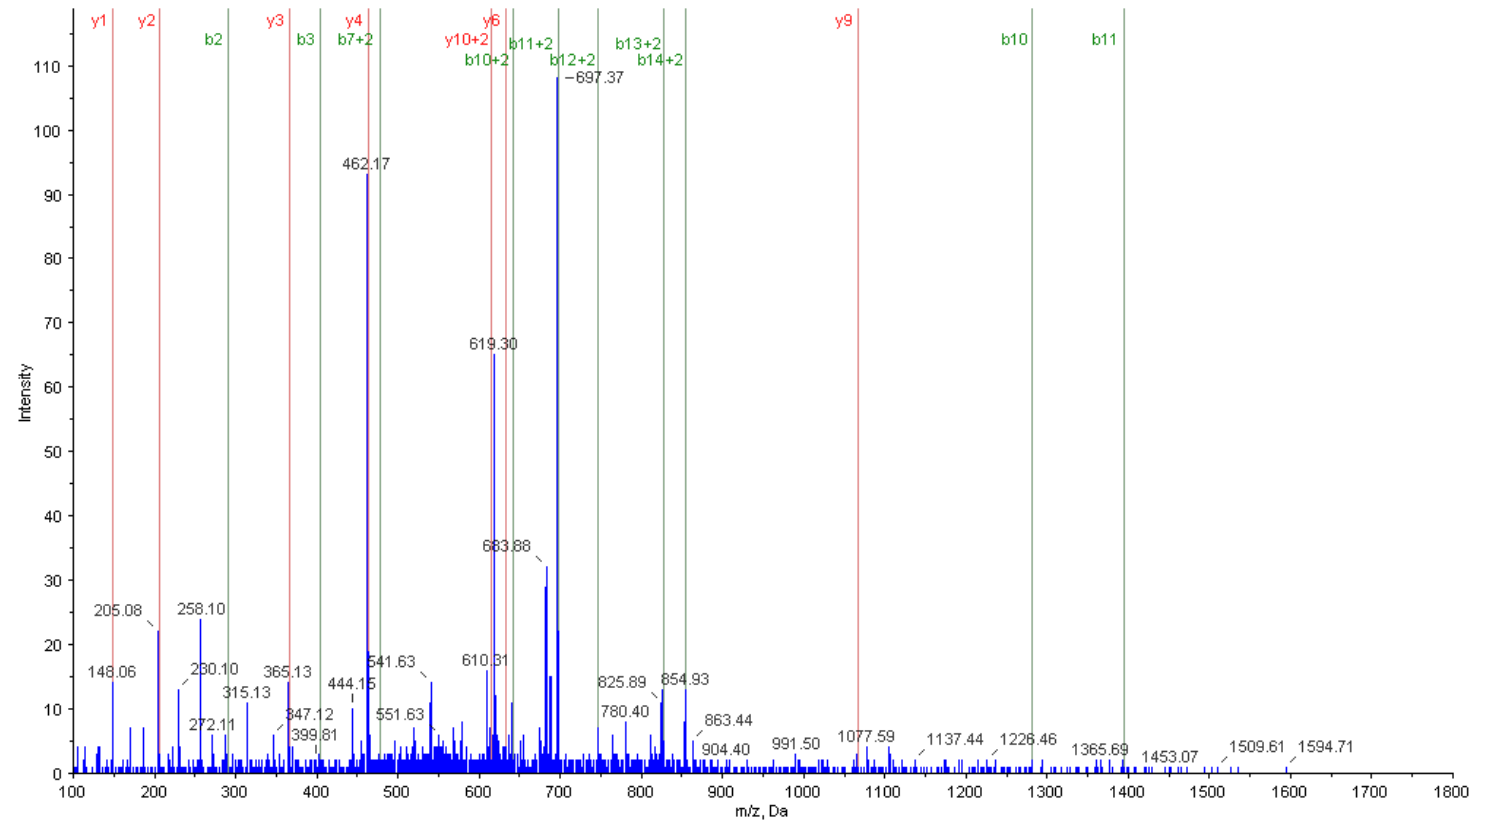

**Supplementary spectrum E5c:** MS/MS of  $m/z$  618.95 (mass 1853.84 Da) showing sequence ion coverage. The derived sequence is CKNKVCYRNGIPCGE.

**Chymotrypsin digest:**

**RNGIPCGESCVFIPCISTVIGCSCKNKVCY**

**Fragmentation Evidence for Peptide**

[RNGIPC[CAM]GESC[CAM]VF

| Residue | b                | b+2             | y               | y+2             |
|---------|------------------|-----------------|-----------------|-----------------|
| R       | 157.1084         | 79.0578         | 1395.6144       | <b>698.3108</b> |
| N       | <b>271.1513</b>  | 136.0793        | 1239.5133       | 620.2603        |
| G       | <b>328.1728</b>  | 164.5900        | 1125.4703       | 563.2388        |
| I       | <b>441.2568</b>  | 221.1321        | 1068.4489       | 534.7281        |
| P       | 538.3096         | 269.6584        | <b>955.3648</b> | 478.1860        |
| C[CAM]  | <b>698.3403</b>  | 349.6738        | 858.3121        | 429.6597        |
| G       | <b>755.3617</b>  | <b>378.1845</b> | <b>698.2814</b> | 349.6443        |
| E       | <b>884.4043</b>  | <b>442.7058</b> | 641.2599        | 321.1336        |
| S       | <b>971.4363</b>  | <b>486.2218</b> | <b>512.2173</b> | 256.6123        |
| C[CAM]  | <b>1131.4670</b> | <b>566.2371</b> | <b>425.1853</b> | 213.0963        |
| V       | <b>1230.5354</b> | <b>615.7713</b> | <b>265.1547</b> | <b>133.0810</b> |
| F       | 1377.6038        | 689.3055        | <b>166.0863</b> | 83.5468         |

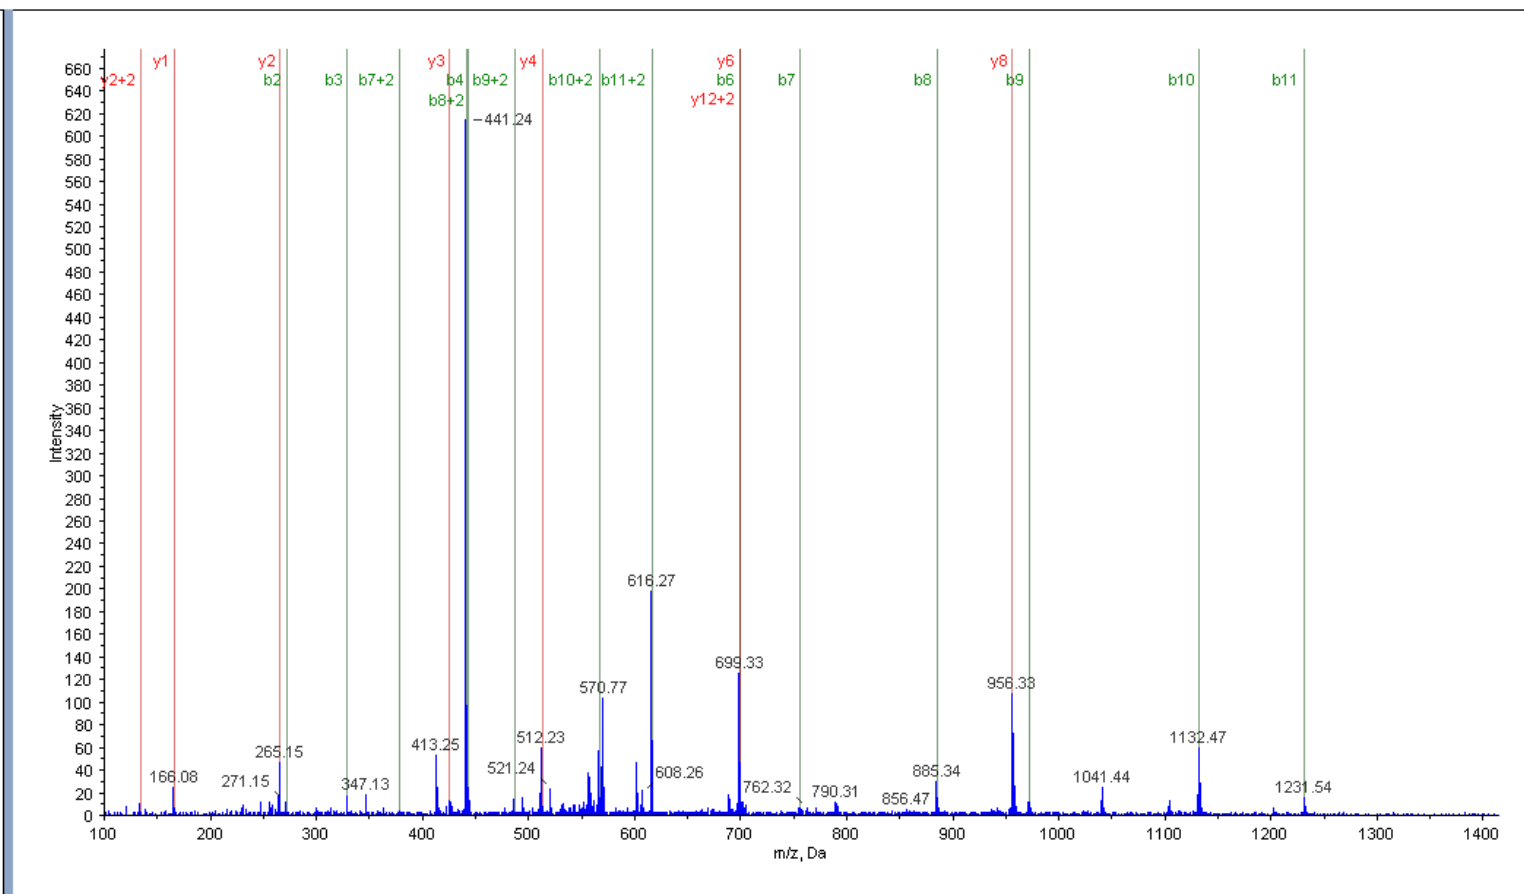

**Supplementary spectrum C5a:** MS/MS of  $m/z$  698.31 (mass 1394.60 Da) showing sequence ion coverage. The derived sequence is RNGIPCGESCVF.



Fragmentation Evidence for Peptide

IPC[CAM]STVIGC[CAM]

| Residue | b         | b+2      | y         | y+2      |
|---------|-----------|----------|-----------|----------|
| I       | 114.0913  | 57.5493  | 1119.5537 | 560.2805 |
| P       | 211.1441  | 106.0757 | 1006.4696 | 503.7384 |
| C[CAM]  | 371.1748  | 186.0910 | 909.4169  | 455.2121 |
| I       | 484.2588  | 242.6330 | 749.3862  | 375.1967 |
| S       | 571.2908  | 286.1491 | 636.3021  | 318.6547 |
| T       | 672.3385  | 336.6729 | 549.2701  | 275.1387 |
| V       | 771.4069  | 386.2071 | 448.2224  | 224.6149 |
| I       | 884.4910  | 442.7491 | 349.1540  | 175.0806 |
| G       | 941.5125  | 471.2599 | 236.0700  | 118.5386 |
| C[CAM]  | 1101.5431 | 551.2752 | 179.0485  | 90.0279  |

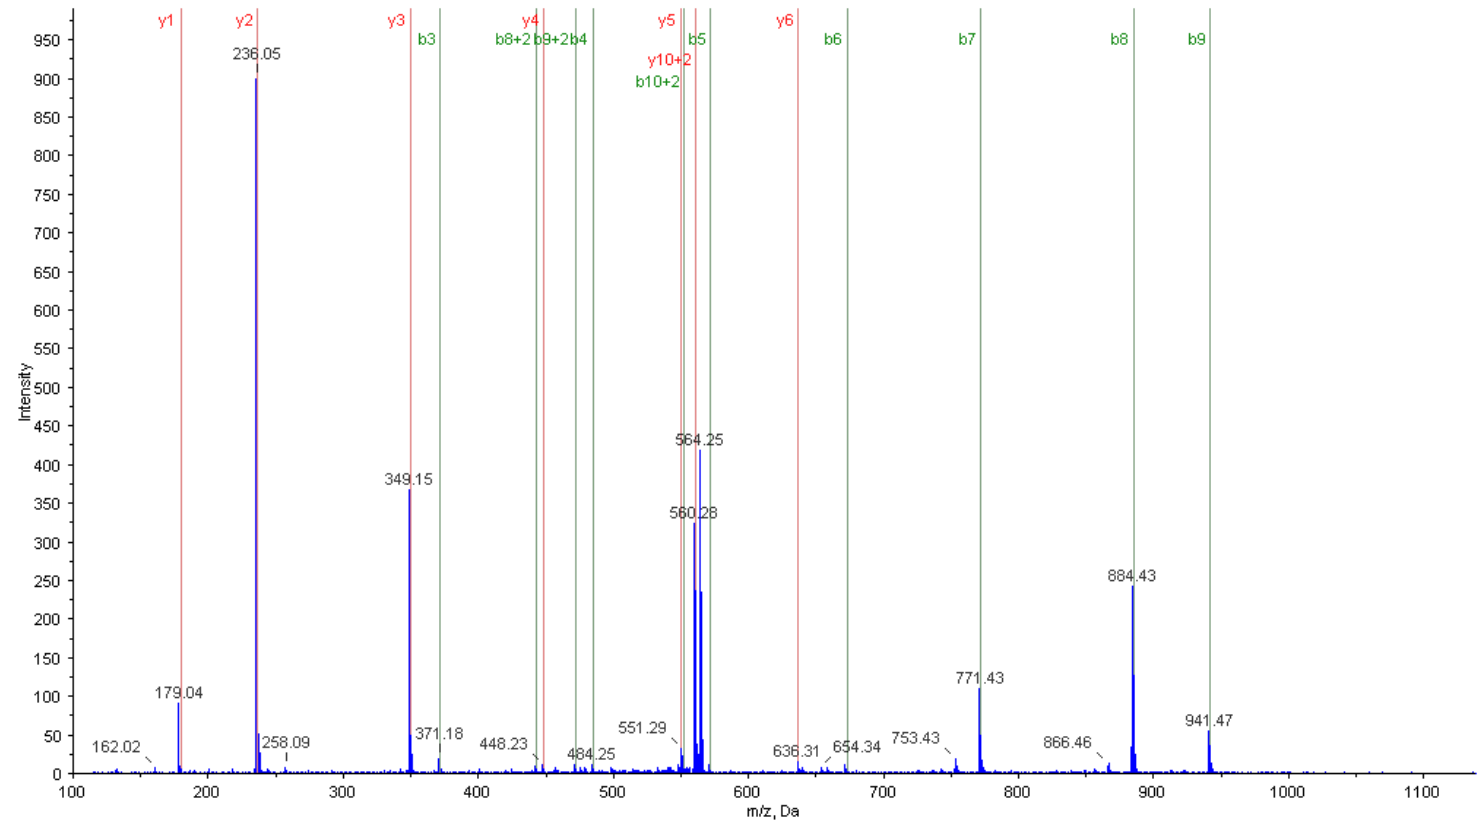

Supplementary spectrum C5b: MS/MS of m/z 560.28 (mass 1118.54 Da) showing sequence ion coverage. The derived sequence is IPCISTVIGC.

## Fragmentation Evidence for Peptide

IPC[CAM]STVIGC[CAM]SC[CAM]KNKVC[CAM]

| Residue | b         | b+2      | y         | y+2      |
|---------|-----------|----------|-----------|----------|
| I       | 114.0913  | 57.5493  | 1995.9483 | 998.4778 |
| P       | 211.1441  | 106.0757 | 1882.8642 | 941.9357 |
| C[CAM]  | 371.1748  | 186.0910 | 1785.8114 | 893.4094 |
| I       | 484.2588  | 242.6330 | 1625.7808 | 813.3940 |
| S       | 571.2908  | 286.1491 | 1512.6967 | 756.8520 |
| T       | 672.3385  | 336.6729 | 1425.6647 | 713.3360 |
| V       | 771.4069  | 386.2071 | 1324.6170 | 662.8121 |
| I       | 884.4910  | 442.7491 | 1225.5486 | 613.2779 |
| G       | 941.5125  | 471.2599 | 1112.4645 | 556.7359 |
| C[CAM]  | 1101.5431 | 551.2752 | 1055.4431 | 528.2252 |
| S       | 1188.5751 | 594.7912 | 895.4124  | 448.2099 |
| C[CAM]  | 1348.6058 | 674.8065 | 808.3804  | 404.6938 |
| K       | 1476.7008 | 738.8540 | 648.3498  | 324.6785 |
| N       | 1590.7437 | 795.8755 | 520.2548  | 260.6310 |
| K       | 1718.8386 | 859.9230 | 406.2119  | 203.6096 |
| V       | 1817.9071 | 909.4572 | 278.1169  | 139.5621 |
| C[CAM]  | 1977.9377 | 989.4725 | 179.0485  | 90.0279  |

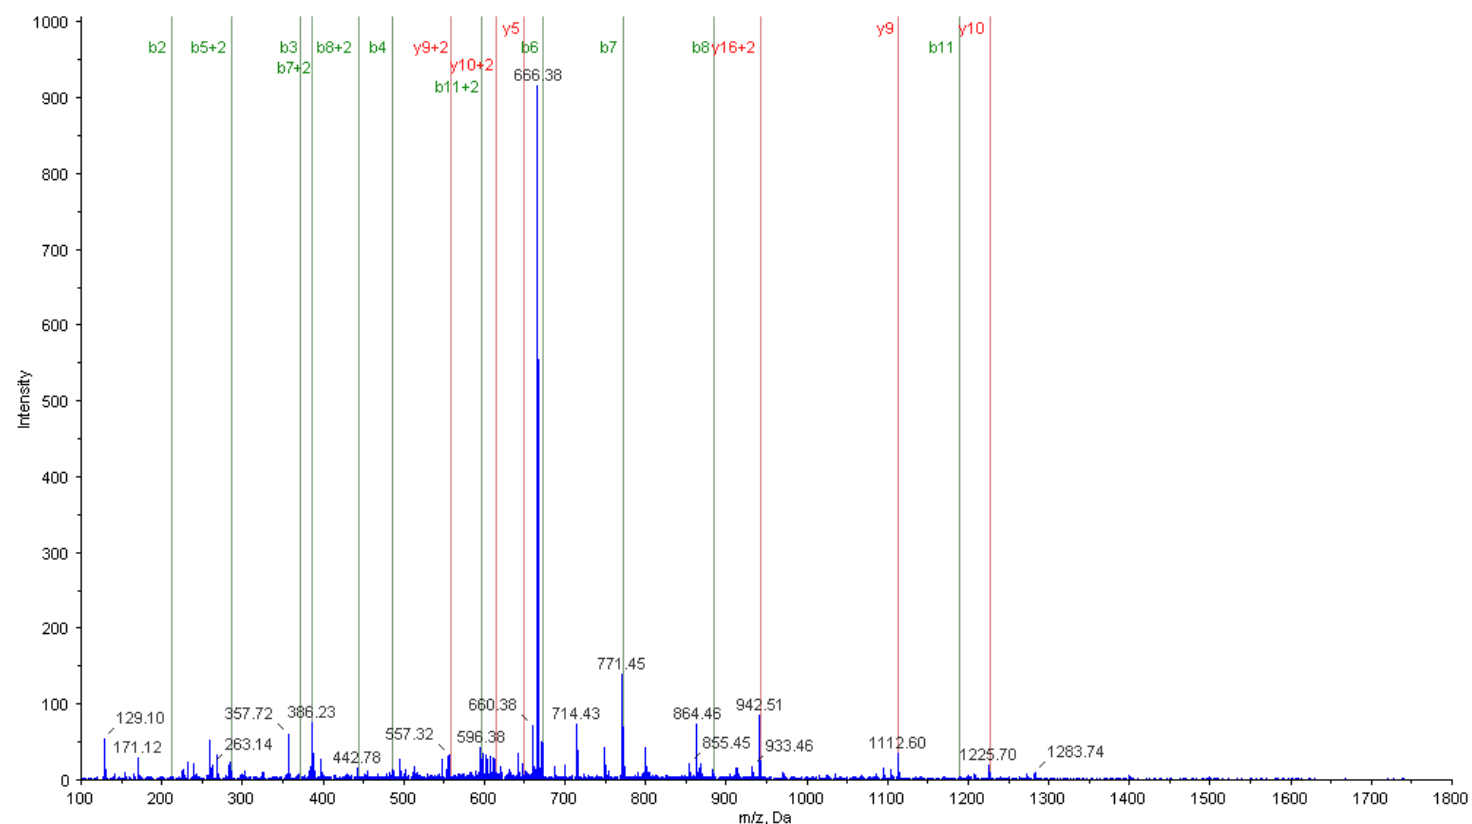

**Supplementary spectrum C5c:** MS/MS of  $m/z$  666.03 (mass 1995.09 Da) showing sequence ion coverage. The derived sequence is IPCISTVIGCSCKNKVC.

## Evidence for Cter R:

### Endoproteinase Glu-C digest:

**SCVFIPCTVTALLGCSCKDKVCYKNGIPCGE**

NB: This peptide shows 93% sequence homology to Cyclopsychotride-A (P56872) from *Psychotria longipes*.

```

1  GIPCGESCVFIPCTVTALLGCSCKDKVCYKN  31  Cter_R
1  SIPCGESCVFIPCTVTALLGCSCKSKVCYKN  31  Cyclopsychotride-A
   .*****.*****.*****

```

### Fragmentation Evidence for Peptide

SC[CAM]VFIP[CAM]TVTALLGC[CAM]SC[CAM]KDKVC[CAM]YKN[Dea]GIPC[CAM]GE

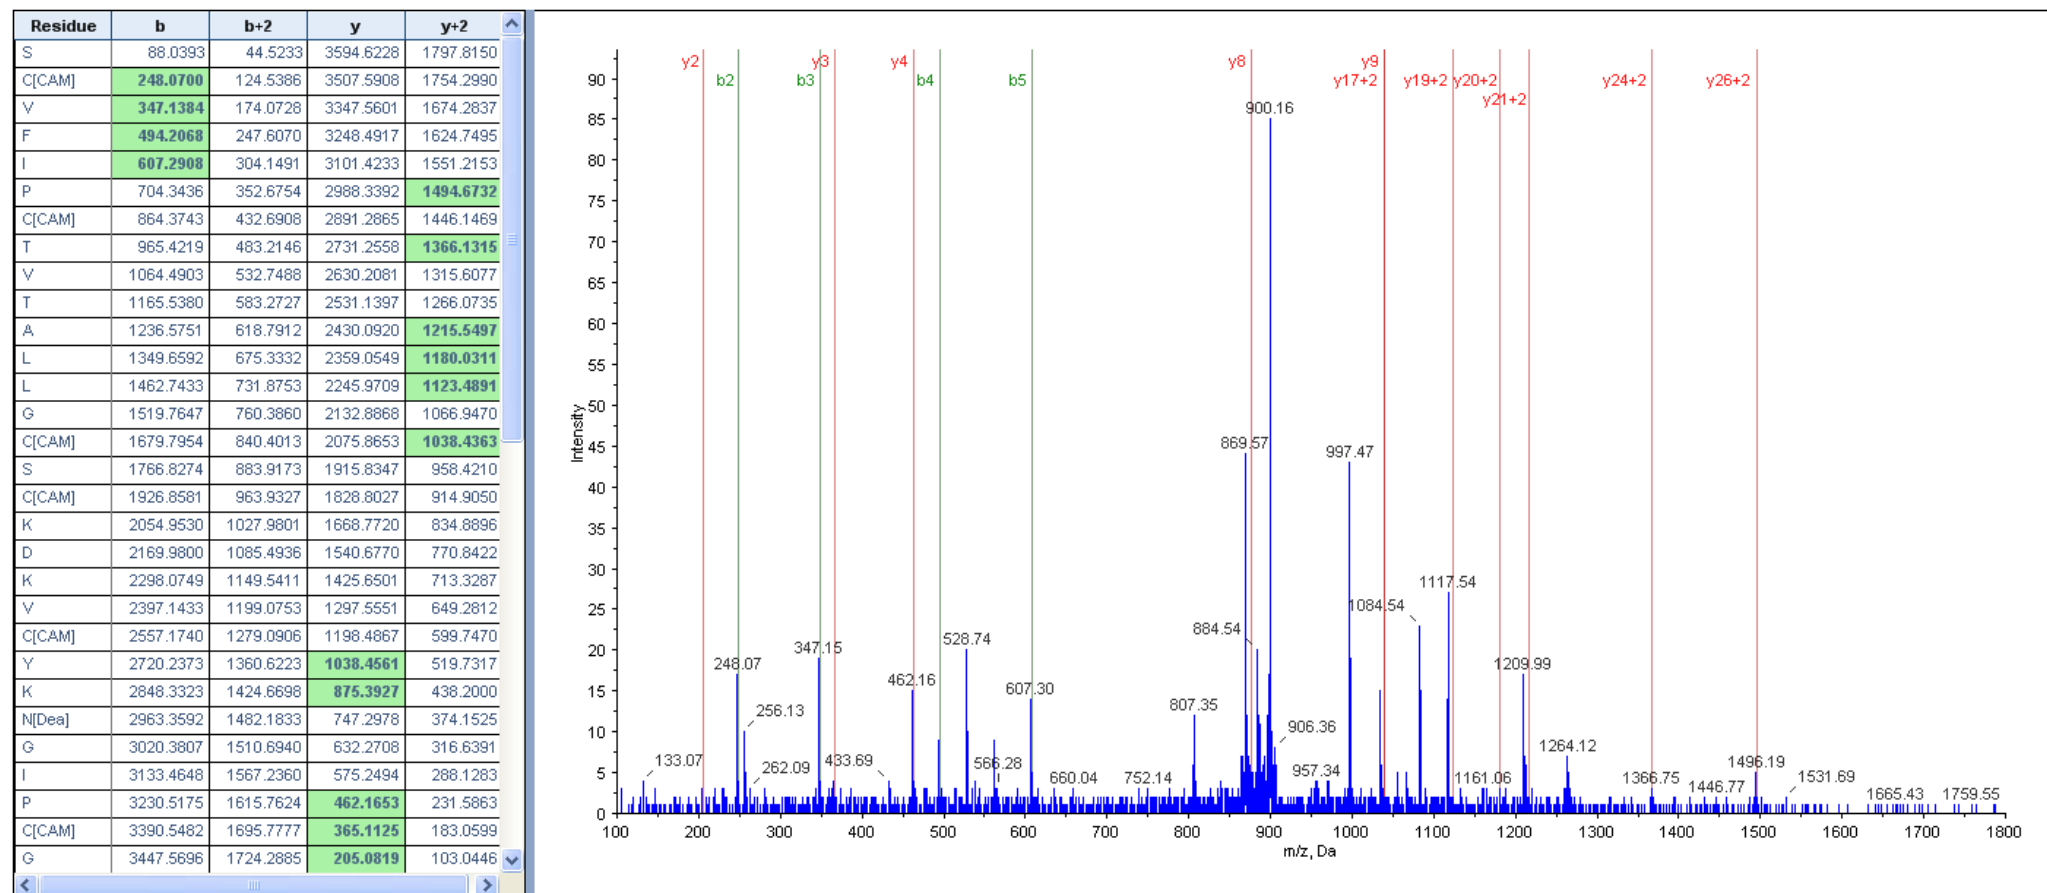

Supplementary spectrum E6a: MS/MS of  $m/z$  899.17 (mass 3592.66 Da) showing sequence ion coverage. The derived sequence is SCVFIPCTVTALLGCSCKDKVCYKNGIPCGE.

Fragmentation Evidence for Peptide

SC[CAM]VFIPC[CAM]VTALLGC[CAM]S

| Residue | b         | b+2      | y         | y+2      |
|---------|-----------|----------|-----------|----------|
| S       | 88.0393   | 44.5233  | 1784.8380 | 892.9226 |
| C[CAM]  | 248.0700  | 124.5386 | 1697.8059 | 849.4066 |
| V       | 347.1384  | 174.0728 | 1537.7753 | 769.3913 |
| F       | 494.2068  | 247.6070 | 1438.7069 | 719.8571 |
| I       | 607.2908  | 304.1491 | 1291.6385 | 646.3229 |
| P       | 704.3436  | 352.6754 | 1178.5544 | 589.7808 |
| C[CAM]  | 864.3743  | 432.6908 | 1081.5016 | 541.2545 |
| T       | 965.4219  | 483.2146 | 921.4710  | 461.2391 |
| V       | 1064.4903 | 532.7488 | 820.4233  | 410.7153 |
| T       | 1165.5380 | 583.2727 | 721.3549  | 361.1811 |
| A       | 1236.5751 | 618.7912 | 620.3072  | 310.6572 |
| L       | 1349.6592 | 675.3332 | 549.2701  | 275.1387 |
| L       | 1462.7433 | 731.8753 | 436.1860  | 218.5967 |
| G       | 1519.7647 | 760.3860 | 323.1020  | 162.0546 |
| C[CAM]  | 1679.7954 | 840.4013 | 266.0805  | 133.5439 |
| S       | 1766.8274 | 883.9173 | 106.0498  | 53.5286  |

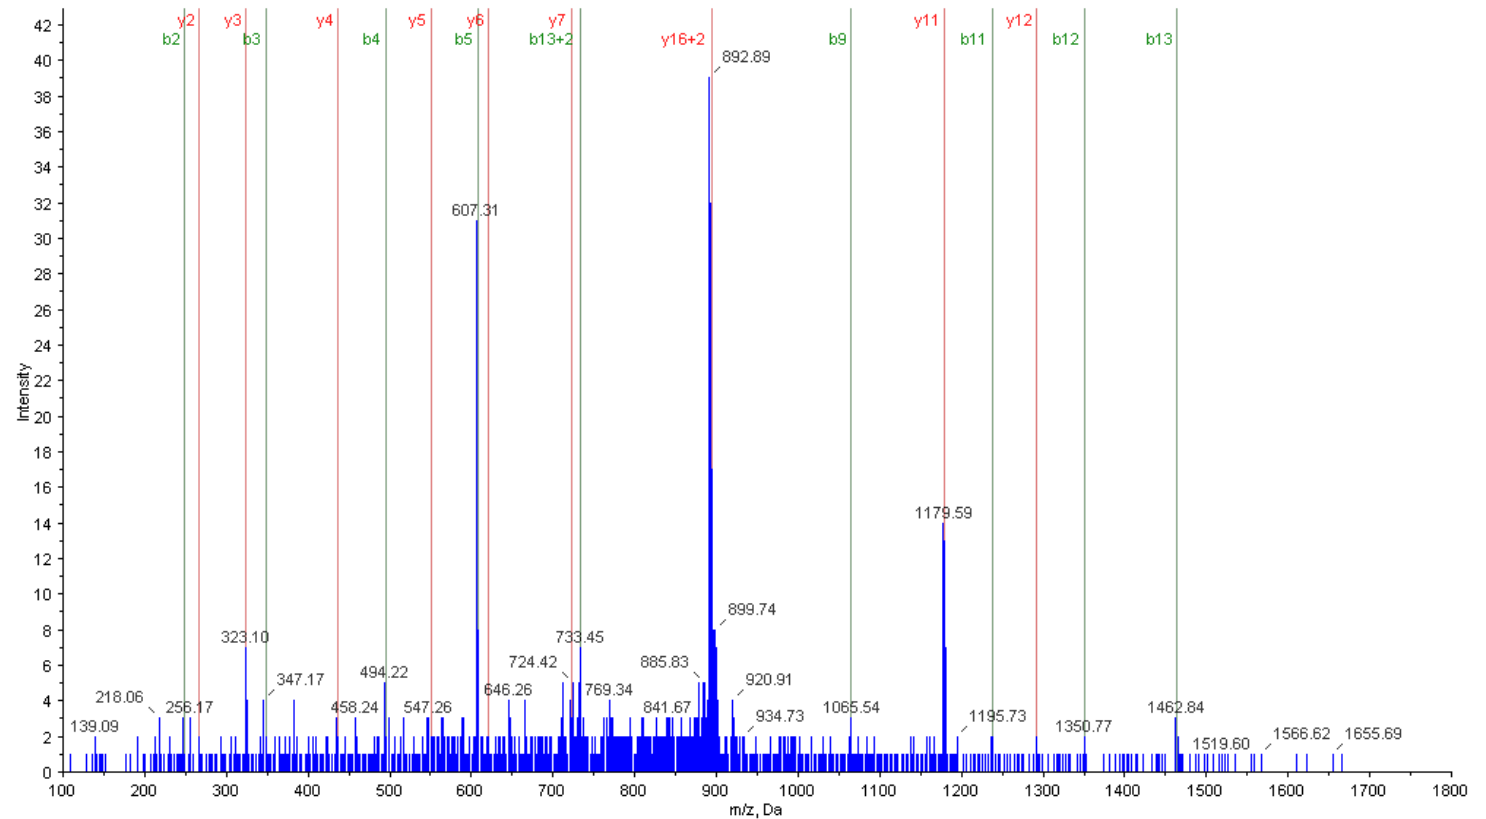

Supplementary spectrum E6b: MS/MS of  $m/z$  892.95 (mass 1783.88 Da) showing sequence ion coverage. The derived sequence is SCVFIPCVTALLGCS.

## Fragmentation Evidence for Peptide

C[CAM]KDKVC[CAM]YKNGIPC[CAM]GE

| Residue | b         | b+2      | y         | y+2      |
|---------|-----------|----------|-----------|----------|
| C[CAM]  | 161.0379  | 81.0226  | 1827.8186 | 914.4130 |
| K       | 289.1329  | 145.0701 | 1667.7880 | 834.3976 |
| D       | 404.1598  | 202.5836 | 1539.6930 | 770.3502 |
| K       | 532.2548  | 266.6310 | 1424.6661 | 712.8367 |
| V       | 631.3232  | 316.1652 | 1296.5711 | 648.7892 |
| C[CAM]  | 791.3539  | 396.1806 | 1197.5027 | 599.2550 |
| Y       | 954.4172  | 477.7122 | 1037.4721 | 519.2397 |
| K       | 1082.5121 | 541.7597 | 874.4087  | 437.7080 |
| N       | 1196.5551 | 598.7812 | 746.3138  | 373.6605 |
| G       | 1253.5765 | 627.2919 | 632.2708  | 316.6391 |
| I       | 1366.6606 | 683.8339 | 575.2494  | 288.1283 |
| P       | 1463.7134 | 732.3603 | 462.1653  | 231.5863 |
| C[CAM]  | 1623.7440 | 812.3756 | 365.1125  | 183.0599 |
| G       | 1680.7655 | 840.8864 | 205.0819  | 103.0446 |
| E       | 1809.8081 | 905.4077 | 148.0604  | 74.5339  |

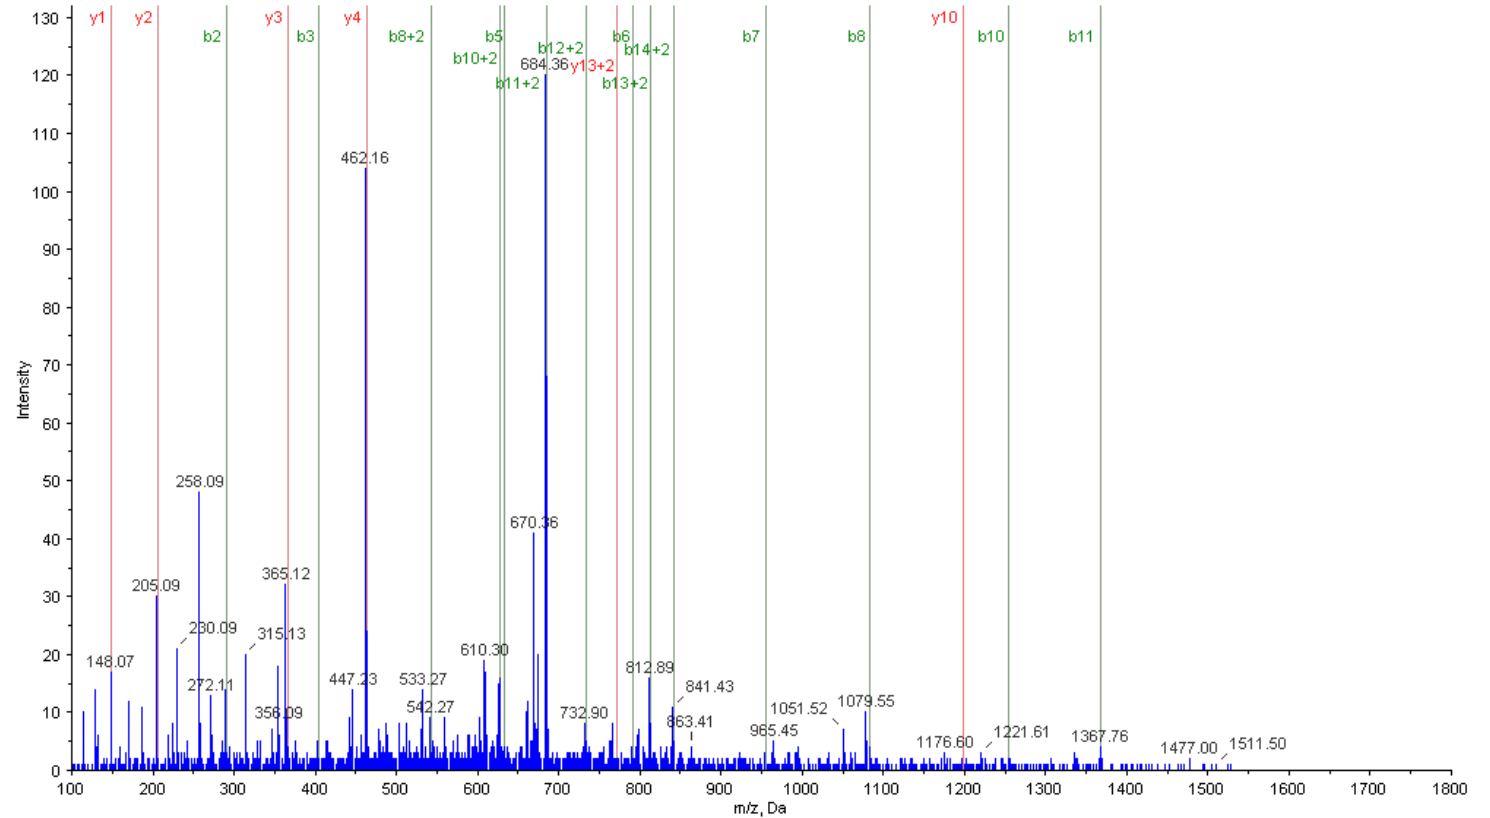

**Supplementary spectrum E6c:** MS/MS of  $m/z$  609.95 (mass 1826.83 Da) showing sequence ion coverage. The derived sequence is CKDKVCYKNGIPCGE.

**Chymotrypsin digest:**

**KNGIPCGESC~~V~~FIPCTVTALLGC~~S~~CKDKVCY**

**Fragmentation Evidence for Peptide**

KN[Dea]GIPC[CAM]GESC[CAM]VF

| Residue | b         | b+2      | y         | y+2      |
|---------|-----------|----------|-----------|----------|
| K       | 129.1022  | 65.0548  | 1368.5922 | 684.7998 |
| N[Dea]  | 244.1292  | 122.5682 | 1240.4973 | 620.7523 |
| G       | 301.1506  | 151.0790 | 1125.4703 | 563.2388 |
| I       | 414.2347  | 207.6210 | 1068.4489 | 534.7281 |
| P       | 511.2875  | 256.1474 | 955.3648  | 478.1860 |
| C[CAM]  | 671.3181  | 336.1627 | 858.3121  | 429.6597 |
| G       | 728.3396  | 364.6734 | 698.2814  | 349.6443 |
| E       | 857.3822  | 429.1947 | 641.2599  | 321.1336 |
| S       | 944.4142  | 472.7107 | 512.2173  | 256.6123 |
| C[CAM]  | 1104.4449 | 552.7261 | 425.1853  | 213.0963 |
| V       | 1203.5133 | 602.2603 | 265.1547  | 133.0810 |
| F       | 1350.5817 | 675.7945 | 166.0863  | 83.5468  |

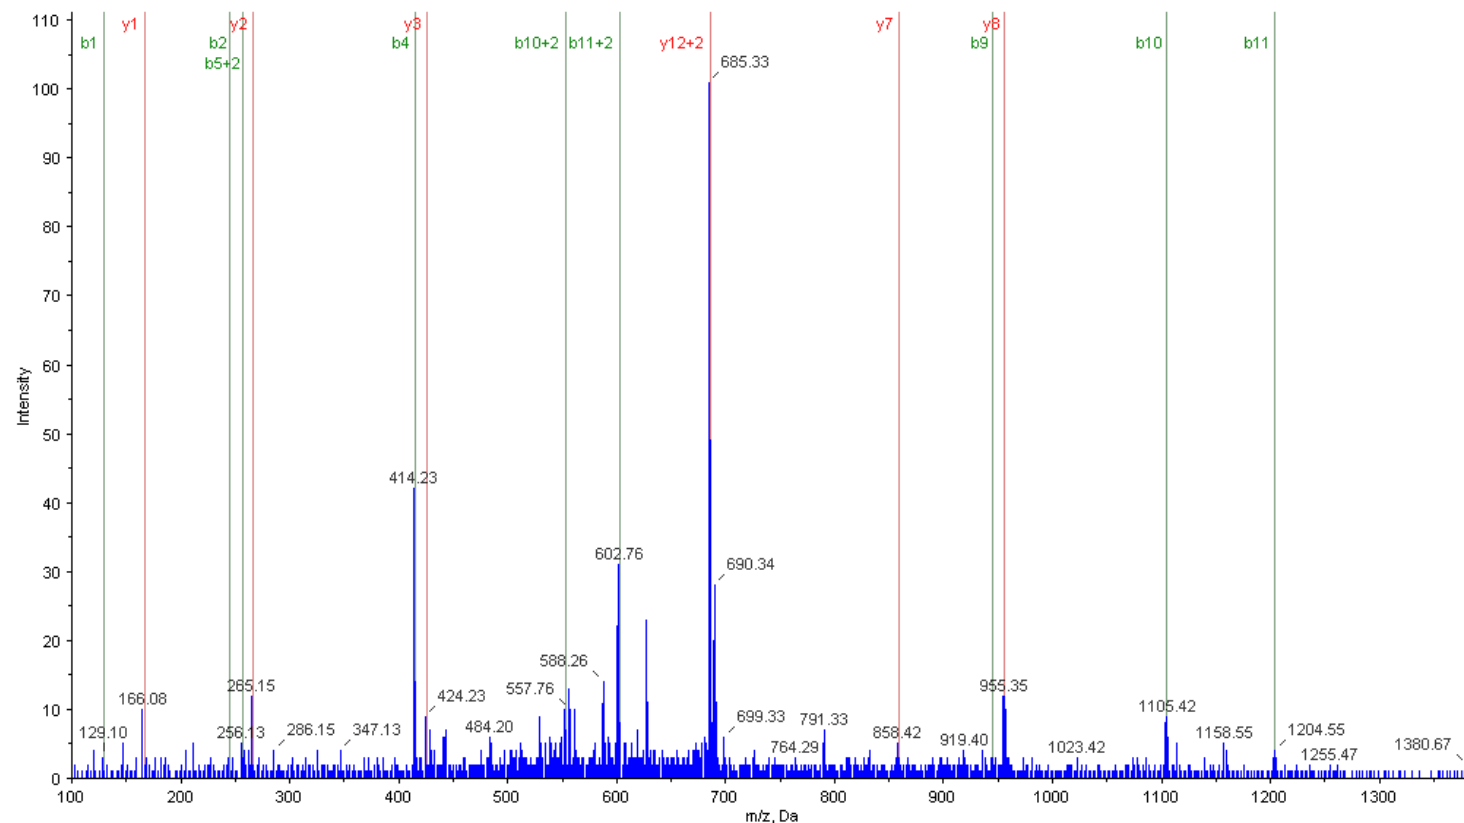

**Supplementary spectrum C6a:** MS/MS of  $m/z$  684.81 (mass 1367.61 Da) showing sequence ion coverage. The derived sequence is KNGIPCGESC~~V~~F.

**(b) SignalP analyses of Cter M and kalata B1 alongside selected albumin-1 precursors from Fabaceae.**

Panel A- SignalP (1) analysis of Cter M precursor protein predicts signal peptidase cleavage at the proto-N-terminus of the mature cyclotide sequence, between precursor protein residues 24 and 25 (72.9% probability). Panel B- SignalP analysis of kalata B1 precursor protein predicts signal peptidase cleavage between precursor protein residues 22 and 23 (82.5% probability). As in all previously characterized cyclotide genes, a pro-region and an N-terminal repeat region are encoded prior to the start of the first cyclotide domain. Panels C through F- Respective SignalP analyses of albumin-1 precursor proteins from *Pisum sativum*, *Medicago truncatula*, *Phaseolus vulgaris*, and *Glycine max* predict signal peptidase cleavage at the proto-N-termini of mature PA1b peptide sequences. Cleavages are predicted between residues 26 and 27 (53.0%), 22 and 23 (51.1%), 27 and 28 (69.7%), and 19 and 20 (98.6%) respectively.

1. Bendtsen JD, Nielsen H, von Heijne G, & Brunak S (2004) Improved prediction of signal peptides: SignalP 3.0. *J Mol Biol* 340:783-795.

SignalP-NN result:

A

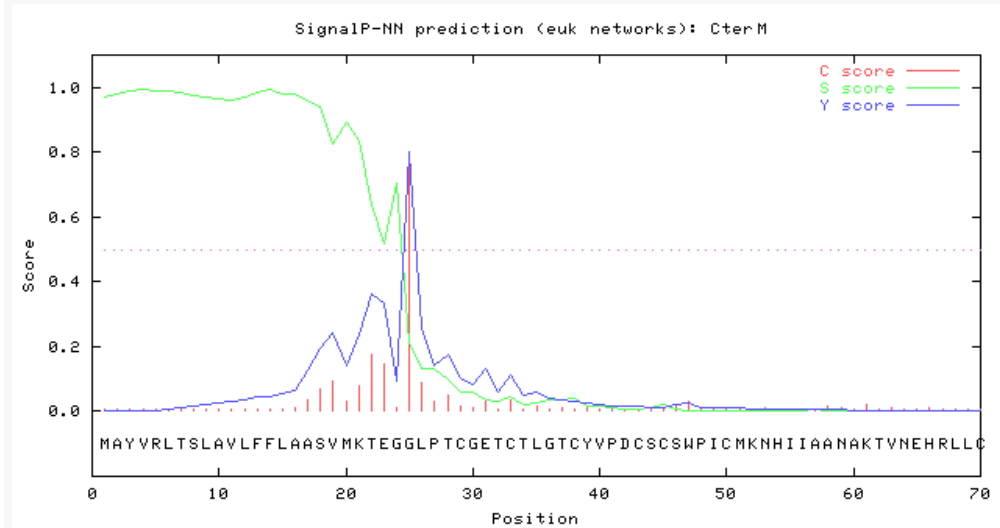

# [data](#)

```
>Cter M
# Measure Position Value Cutoff signal peptide?
max. C 25 0.802 0.32 YES
max. Y 25 0.801 0.33 YES
max. S 14 0.994 0.87 YES
mean S 1-24 0.916 0.48 YES
D 1-24 0.858 0.43 YES
# Most likely cleavage site between pos. 24 and 25: TEG-GL
```

SignalP-HMM result:

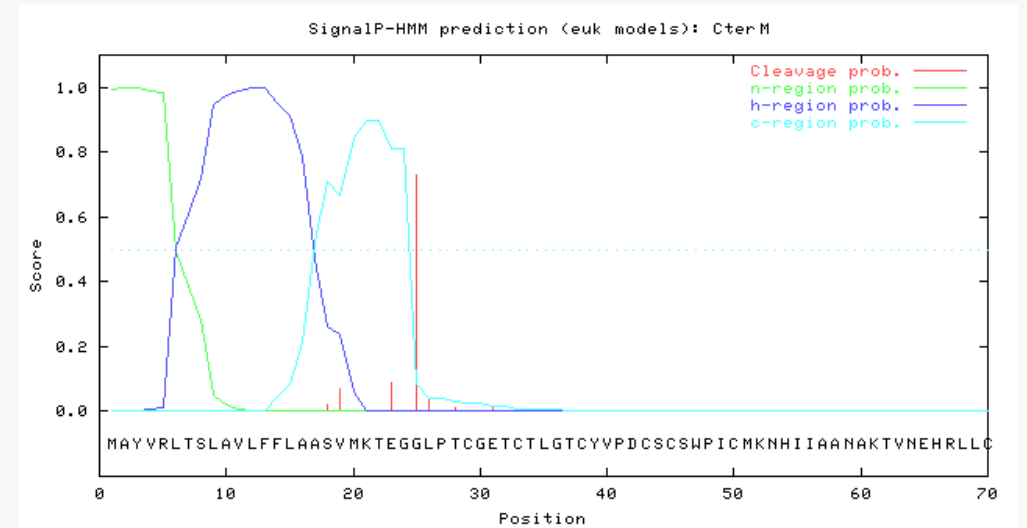

# [data](#)

```
>Cter M
Prediction: Signal peptide
Signal peptide probability: 0.993
Signal anchor probability: 0.006
Max cleavage site probability: 0.729 between pos. 24 and 25
```

*Clitoria ternatea* Cter M SignalP analysis.



SignalP-NN result:

B

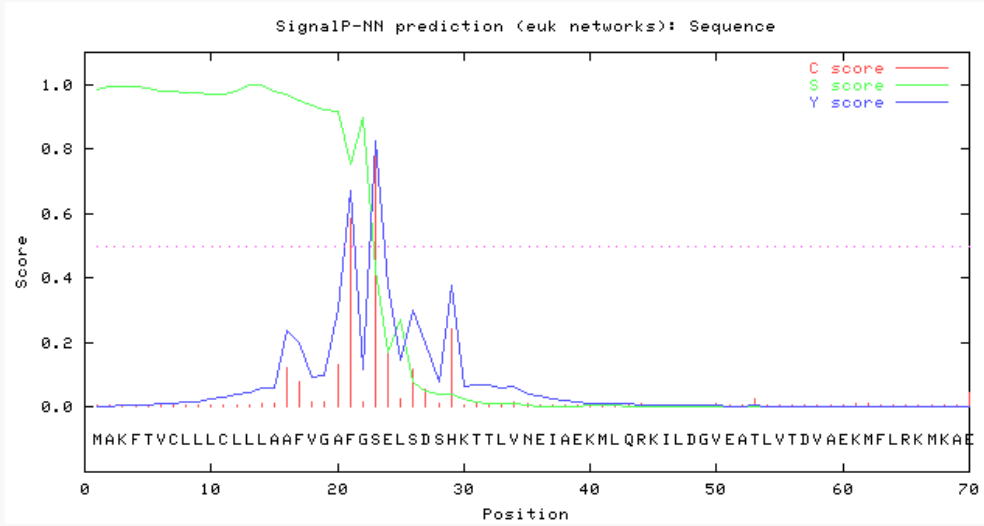

# [data](#)

```
>Sequence length = 70
# Measure Position Value Cutoff signal peptide?
max. C 23 0.793 0.32 YES
max. Y 23 0.826 0.33 YES
max. S 13 0.998 0.87 YES
mean S 1-22 0.959 0.48 YES
D 1-22 0.893 0.43 YES
# Most likely cleavage site between pos. 22 and 23: AFG-SE
```

SignalP-HMM result:

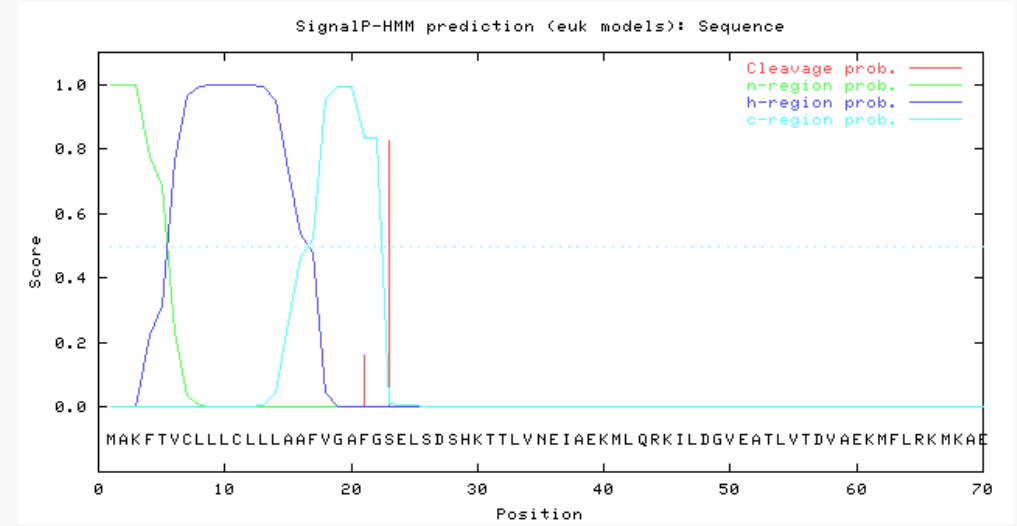

# [data](#)

```
>Sequence
Prediction: Signal peptide
Signal peptide probability: 1.000
Signal anchor probability: 0.000
Max cleavage site probability: 0.825 between pos. 22 and 23
```

*Oldenlandia affinis* kalata B1 SignalP analysis.

SignalP-NN result:

C

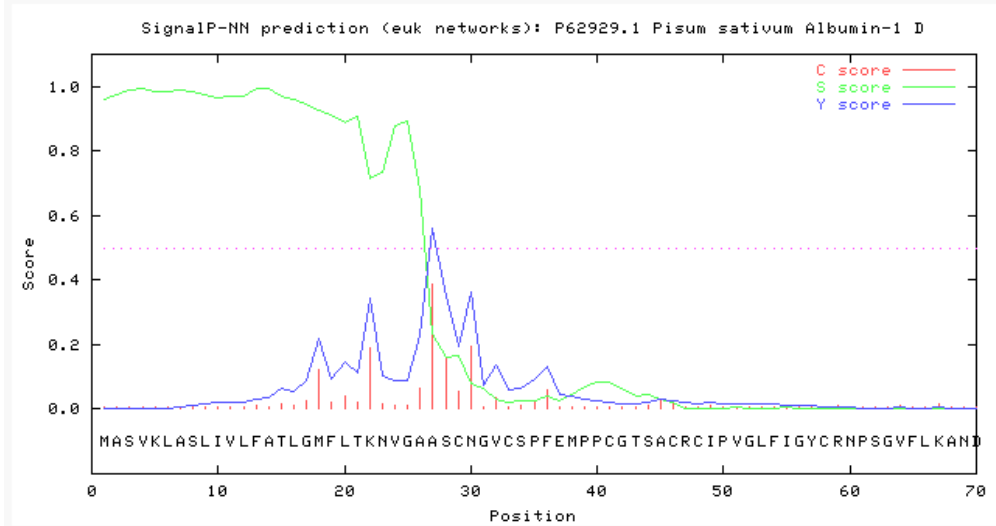

# [data](#)

```
>P62929.1_Pisum_sativ length = 70
# Measure Position Value Cutoff signal peptide?
max. C 27 0.388 0.32 YES
max. Y 27 0.560 0.33 YES
max. S 14 0.995 0.87 YES
mean S 1-26 0.929 0.48 YES
D 1-26 0.745 0.43 YES
# Most likely cleavage site between pos. 26 and 27: VGA-AS
```

SignalP-HMM result:

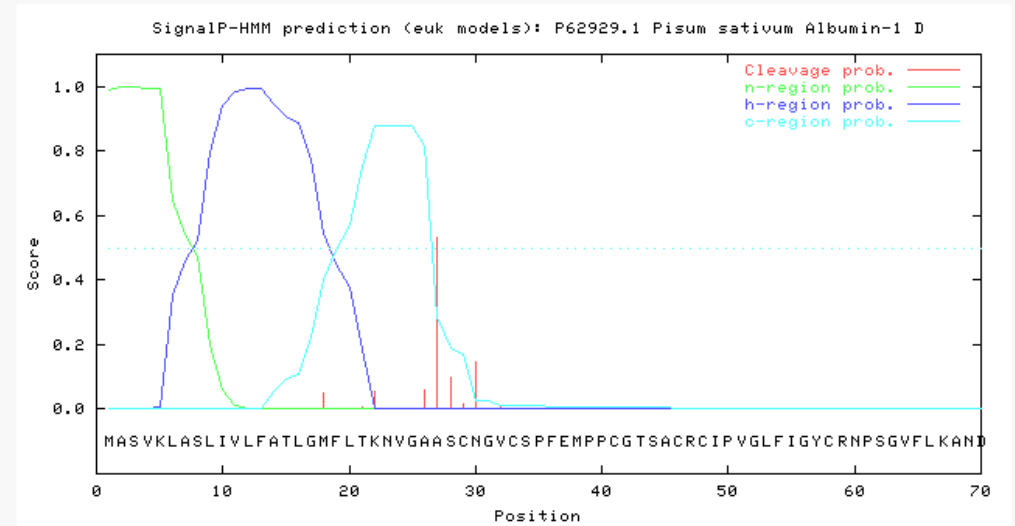

# [data](#)

```
>P62929.1_Pisum_sativum_Albumin-1_D
Prediction: Signal peptide
Signal peptide probability: 0.991
Signal anchor probability: 0.008
Max cleavage site probability: 0.530 between pos. 26 and 27
```

*Pisum sativum* Albumin-1 SignalP analysis.

SignalP-NN result:

D

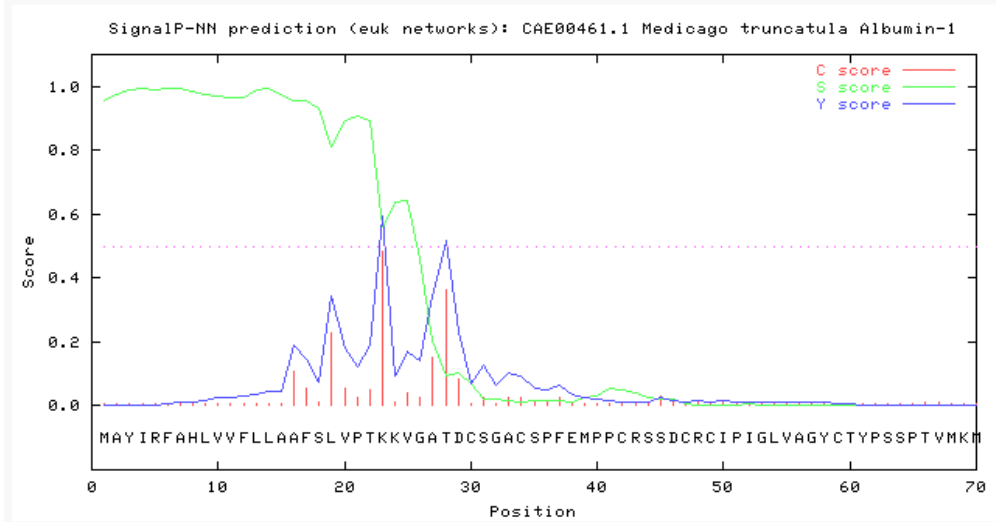

# data

```
>CAE00461.1_Medicago_ length = 70
# Measure Position Value Cutoff signal peptide?
max. C 23 0.483 0.32 YES
max. Y 23 0.596 0.33 YES
max. S 6 0.994 0.87 YES
mean S 1-22 0.957 0.48 YES
D 1-22 0.777 0.43 YES
# Most likely cleavage site between pos. 22 and 23: VPT-KK
```

SignalP-HMM result:

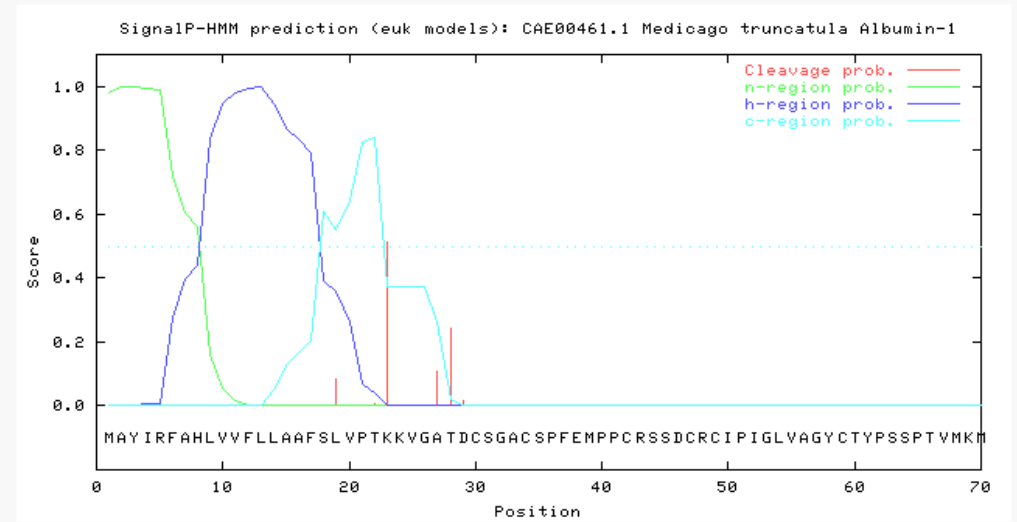

# data

```
>CAE00461.1_Medicago_truncatula_Albumin-1
Prediction: Signal peptide
Signal peptide probability: 0.981
Signal anchor probability: 0.017
Max cleavage site probability: 0.511 between pos. 22 and 23
```

*Medicago truncatula* Albumin-1 SignalP analysis.

SignalP-NN result:

E

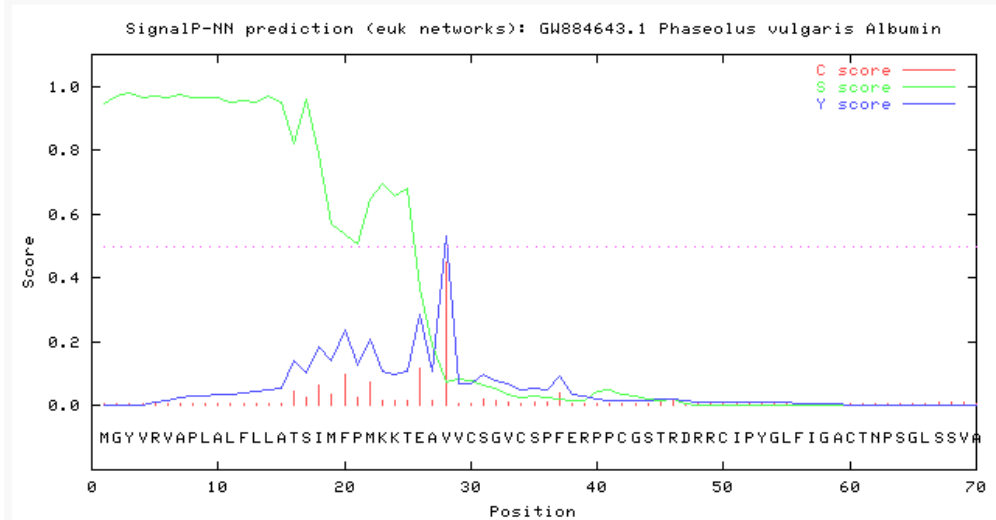

# data

```
>GW884643.1_Phaseolus length = 70
# Measure Position Value Cutoff signal peptide?
max. C 28 0.451 0.32 YES
max. Y 28 0.530 0.33 YES
max. S 3 0.979 0.87 YES
mean S 1-27 0.809 0.48 YES
D 1-27 0.669 0.43 YES
# Most likely cleavage site between pos. 27 and 28: TEA-VV
```

SignalP-HMM result:

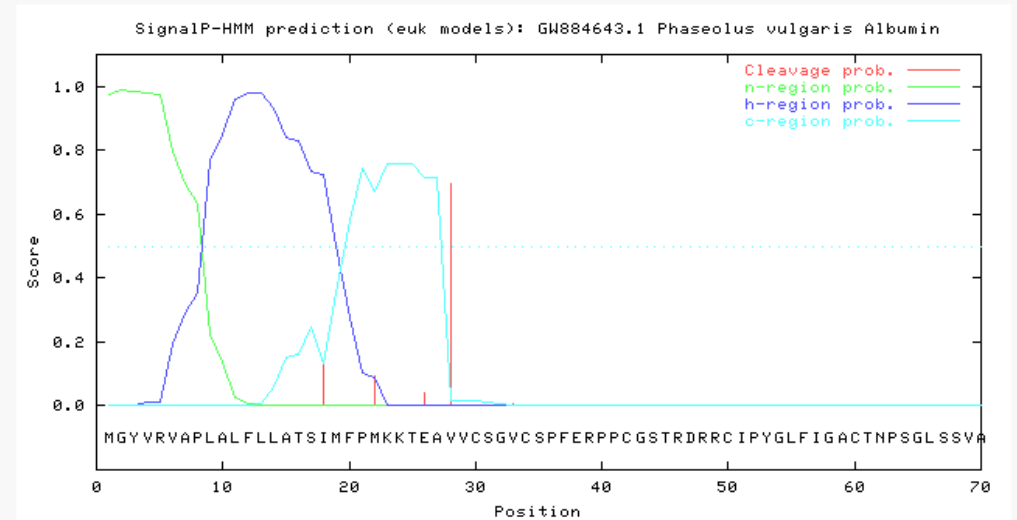

# data

```
>GW884643.1_Phaseolus_vulgaris_Albumin
Prediction: Signal peptide
Signal peptide probability: 0.977
Signal anchor probability: 0.011
Max cleavage site probability: 0.697 between pos. 27 and 28
```

*Phaseolus vulgaris* Albumin-1 SignalP analysis.

SignalP-NN result:

F

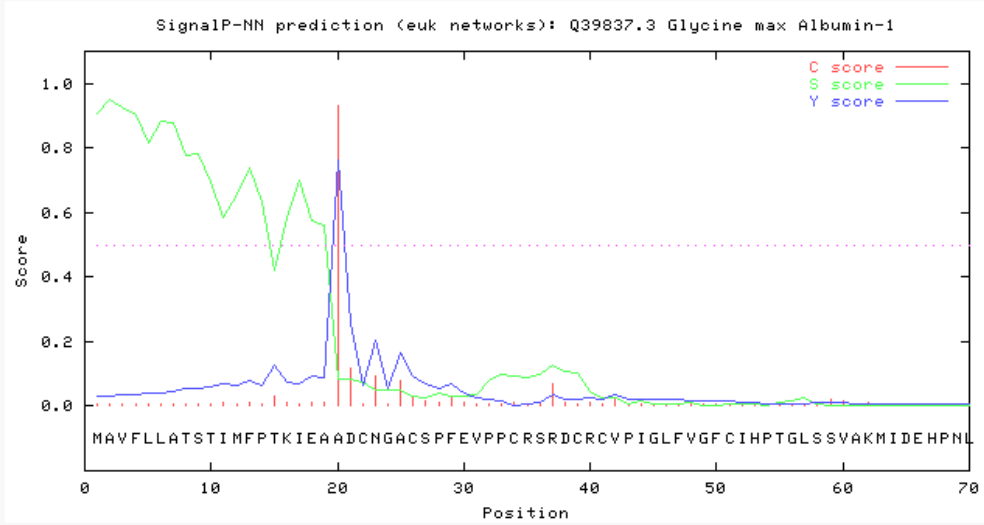

# [data](#)

```
>Q39837.3_Glycine_max length = 70
# Measure Position Value Cutoff signal peptide?
max. C      20      0.932  0.32  YES
max. Y      20      0.761  0.33  YES
max. S       2      0.950  0.87  YES
mean S     1-19     0.735  0.48  YES
D          1-19     0.748  0.43  YES
# Most likely cleavage site between pos. 19 and 20: IEA-AD
```

SignalP-HMM result:

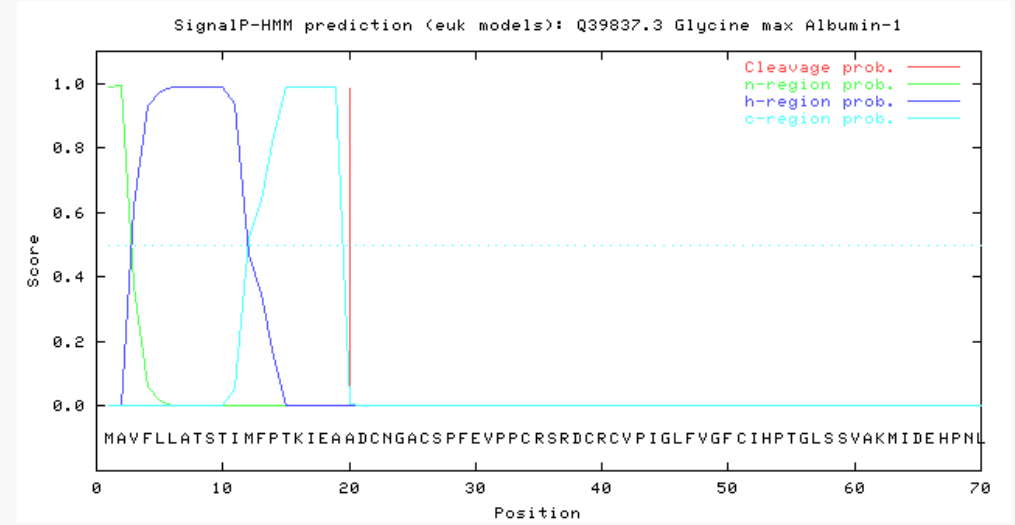

# [data](#)

```
>Q39837.3_Glycine_max_Albumin-1
Prediction: Signal peptide
Signal peptide probability: 0.991
Signal anchor probability: 0.001
Max cleavage site probability: 0.986 between pos. 19 and 20
```

*Glycine max* Albumin-1 SignalP analysis.
